# Supplementary material
Source: publisher figshare collection journal article supplement (https://rs.figshare.com/ndownloader/files/24808643)
Supplement: Supplementary file 1 [file 24808643]

## Sheet: figure1(a)
3.75785	3.64675	3.53489	3.42218	3.30852	3.19377	3.07778	2.96034	2.84121	2.72007	2.5965	2.46993	2.33956	2.20423	2.06202	1.90949	1.73914	1.52489	0.000142607	0.000124799	0.000110946
3.72796	3.61634	3.50394	3.39069	3.27646	3.16113	3.04453	2.92648	2.80673	2.68496	2.56076	2.43358	2.30261	2.16674	2.02412	1.87142	1.70142	1.48929	0.000142599	0.000124793	0.000110942
3.68438	3.57359	3.46204	3.34965	3.2363	3.12185	3.00616	2.88901	2.77014	2.64925	2.52588	2.39946	2.26915	2.13373	1.99122	1.83798	1.66605	1.44748	0.000129328	0.000114509	0.000102738
3.65873	3.5476	3.4357	3.32293	3.20919	3.09433	2.9782	2.86059	2.74123	2.6198	2.49585	2.36878	2.23773	2.10148	1.95798	1.8035	1.62988	1.40839	0.000129324	0.000114506	0.000102737
3.53061	3.41839	3.30536	3.19144	3.07651	2.96043	2.84305	2.72416	2.60351	2.48077	2.35552	2.22718	2.09494	1.9576	1.81326	1.65845	1.48564	1.26873	0.000122878	0.000109425	9.86282e-05
3.44553	3.33462	3.22296	3.11046	2.99699	2.88244	2.76664	2.64938	2.53043	2.40945	2.28603	2.15958	2.02929	1.89396	1.75164	1.5988	1.42771	1.21135	0.000110213	9.92657e-05	9.02978e-05
3.43271	3.32166	3.20985	3.0972	2.98359	2.86889	2.75295	2.63556	2.51649	2.39541	2.2719	2.14539	2.01509	1.87979	1.7376	1.58501	1.41439	1.19893	0.000110211	9.92643e-05	9.02967e-05
3.32896	3.21775	3.10575	2.99284	2.87892	2.76383	2.6474	2.52941	2.40958	2.28755	2.16284	2.0348	1.90248	1.76456	1.6188	1.46101	1.28196	1.0484	0.000103823	9.40526e-05	8.59639e-05
3.32896	3.21775	3.10575	2.99284	2.87892	2.76383	2.6474	2.52941	2.40958	2.28755	2.16284	2.0348	1.90248	1.76456	1.6188	1.46101	1.28196	1.0484	0.000103823	9.40526e-05	8.59639e-05
3.21876	3.1058	2.992	2.87726	2.76148	2.64452	2.52622	2.40637	2.28473	2.16097	2.03469	1.90533	1.77212	1.63393	1.48898	1.33413	1.16269	0.952355	0.000103806	9.40398e-05	8.59538e-05
3.19804	3.08734	2.97585	2.86348	2.7501	2.63557	2.5197	2.40228	2.28303	2.16157	2.03742	1.90991	1.77806	1.64053	1.49498	1.33706	1.1571	0.920019	9.72526e-05	8.86286e-05	8.14101e-05
3.19804	3.08734	2.97585	2.86348	2.7501	2.63557	2.5197	2.40228	2.28303	2.16157	2.03742	1.90991	1.77806	1.64053	1.49498	1.33706	1.1571	0.920019	9.72526e-05	8.86286e-05	8.14101e-05
3.21716	3.10684	2.99575	2.8838	2.77085	2.65677	2.54137	2.42445	2.3057	2.18477	2.06117	1.93423	1.80298	1.66599	1.52089	1.3633	1.18334	0.945302	9.72563e-05	8.86314e-05	8.14123e-05
3.04889	2.93408	2.81816	2.70098	2.58236	2.46208	2.33985	2.21532	2.08802	1.95731	1.82234	1.68181	1.53378	1.38643	1.23814	1.0778	0.896064	0.658985	9.72423e-05	8.86209e-05	8.14042e-05
3.23293	3.12316	3.01266	2.90134	2.78908	2.67576	2.5612	2.44519	2.32748	2.20771	2.08544	1.96003	1.83057	1.69579	1.55353	1.3997	1.22525	0.997458	9.72588e-05	8.86332e-05	8.14137e-05
3.1718	3.06105	2.94956	2.83722	2.72394	2.60957	2.49395	2.3769	2.25814	2.13735	2.01411	1.88781	1.75761	1.62234	1.48	1.32686	1.15471	0.934162	9.725e-05	8.86265e-05	8.14084e-05
3.16504	3.05391	2.942	2.8292	2.71541	2.60048	2.48424	2.36648	2.24693	2.12524	2.00096	1.87345	1.74181	1.60481	1.46033	1.30442	1.12842	0.901433	9.72495e-05	8.86261e-05	8.14081e-05
3.11576	3.00417	2.8918	2.77854	2.66429	2.54889	2.43219	2.31396	2.19395	2.0718	1.94706	1.81909	1.68701	1.54949	1.40436	1.2476	1.07027	0.840135	9.72479e-05	8.8625e-05	8.14074e-05
3.01547	2.9061	2.79603	2.68515	2.57336	2.46052	2.34646	2.23098	2.11382	1.99462	1.87294	1.74814	1.61931	1.48513	1.34334	1.18981	1.0152	0.785373	9.02593e-05	8.27833e-05	7.64515e-05
2.87888	2.76727	2.65487	2.54161	2.42736	2.31199	2.19533	2.07719	1.95731	1.83534	1.71087	1.58327	1.45171	1.31493	1.17087	1.01573	0.841019	0.615987	9.0247e-05	8.27737e-05	7.64439e-05
2.98721	2.87733	2.76671	2.65528	2.54291	2.42947	2.3148	2.19869	2.08087	1.961	1.83864	1.71314	1.5836	1.44879	1.30657	1.15283	0.978506	0.750466	9.02553e-05	8.27801e-05	7.6449e-05
2.98721	2.87733	2.76671	2.65528	2.54291	2.42947	2.3148	2.19869	2.08087	1.961	1.83864	1.71314	1.5836	1.44879	1.30657	1.15283	0.978506	0.750466	9.02553e-05	8.27801e-05	7.6449e-05
3.01547	2.9061	2.79603	2.68515	2.57336	2.46052	2.34646	2.23098	2.11382	1.99462	1.87294	1.74814	1.61931	1.48513	1.34334	1.18981	1.0152	0.785373	9.02593e-05	8.27833e-05	7.64515e-05
2.96295	2.85225	2.74076	2.62838	2.51498	2.40042	2.28451	2.16702	2.04768	1.9261	1.80178	1.67403	1.54187	1.40384	1.2575	1.09831	0.916067	0.673368	9.02526e-05	8.27781e-05	7.64474e-05
3.01547	2.9061	2.79603	2.68515	2.57336	2.46052	2.34646	2.23098	2.11382	1.99462	1.87294	1.74814	1.61931	1.48513	1.34334	1.18981	1.0152	0.785373	9.02593e-05	8.27833e-05	7.64515e-05
3.01547	2.9061	2.79603	2.68515	2.57336	2.46052	2.34646	2.23098	2.11382	1.99462	1.87294	1.74814	1.61931	1.48513	1.34334	1.18981	1.0152	0.785373	9.02593e-05	8.27833e-05	7.64515e-05
3.01547	2.9061	2.79603	2.68515	2.57336	2.46052	2.34646	2.23098	2.11382	1.99462	1.87294	1.74814	1.61931	1.48513	1.34334	1.18981	1.0152	0.785373	9.02593e-05	8.27833e-05	7.64515e-05
3.01547	2.9061	2.79603	2.68515	2.57336	2.46052	2.34646	2.23098	2.11382	1.99462	1.87294	1.74814	1.61931	1.48513	1.34334	1.18981	1.0152	0.785373	9.02593e-05	8.27833e-05	7.64515e-05
2.91612	2.80502	2.69317	2.58044	2.46675	2.35195	2.23587	2.11831	1.99902	1.87764	1.75374	1.62671	1.49567	1.35934	1.21563	1.06058	0.885442	0.658227	9.02487e-05	8.27751e-05	7.6445e-05
3.01547	2.9061	2.79603	2.68515	2.57336	2.46052	2.34646	2.23098	2.11382	1.99462	1.87294	1.74814	1.61931	1.48513	1.34334	1.18981	1.0152	0.785373	9.02593e-05	8.27833e-05	7.64515e-05
2.91531	2.80411	2.69216	2.57934	2.46557	2.3507	2.23459	2.11703	1.99779	1.87655	1.75291	1.62632	1.49601	1.36086	1.21904	1.06736	0.898876	0.689997	9.02448e-05	8.27718e-05	7.64423e-05
3.01547	2.9061	2.79603	2.68515	2.57336	2.46052	2.34646	2.23098	2.11382	1.99462	1.87294	1.74814	1.61931	1.48513	1.34334	1.18981	1.0152	0.785373	9.02593e-05	8.27833e-05	7.64515e-05
2.62127	2.51273	2.40353	2.29358	2.18277	2.07098	1.95804	1.84376	1.72788	1.61007	1.48988	1.36669	1.23962	1.10736	0.967693	0.816431	0.644039	0.414814	8.22245e-05	7.59747e-05	7.06083e-05
2.62127	2.51273	2.40353	2.29358	2.18277	2.07098	1.95804	1.84376	1.72788	1.61007	1.48988	1.36669	1.23962	1.10736	0.967693	0.816431	0.644039	0.414814	8.22245e-05	7.59747e-05	7.06083e-05
2.62127	2.51273	2.40353	2.29358	2.18277	2.07098	1.95804	1.84376	1.72788	1.61007	1.48988	1.36669	1.23962	1.10736	0.967693	0.816431	0.644039	0.414814	8.22245e-05	7.59747e-05	7.06083e-05
2.54431	2.43409	2.32314	2.21136	2.09866	1.98489	1.86991	1.7535	1.63544	1.51539	1.39295	1.26753	1.13834	1.00419	0.863136	0.711721	0.542352	0.328656	8.22147e-05	7.59669e-05	7.0602e-05
2.62127	2.51273	2.40353	2.29358	2.18277	2.07098	1.95804	1.84376	1.72788	1.61007	1.48988	1.36669	1.23962	1.10736	0.967693	0.816431	0.644039	0.414814	8.22245e-05	7.59747e-05	7.06083e-05
2.62127	2.51273	2.40353	2.29358	2.18277	2.07098	1.95804	1.84376	1.72788	1.61007	1.48988	1.36669	1.23962	1.10736	0.967693	0.816431	0.644039	0.414814	8.22245e-05	7.59747e-05	7.06083e-05
2.62127	2.51273	2.40353	2.29358	2.18277	2.07098	1.95804	1.84376	1.72788	1.61007	1.48988	1.36669	1.23962	1.10736	0.967693	0.816431	0.644039	0.414814	8.22245e-05	7.59747e-05	7.06083e-05
2.43447	2.32151	2.20766	2.09281	1.97683	1.85957	1.74084	1.62041	1.49799	1.37321	1.24557	1.11442	0.978819	0.837375	0.687856	0.526221	0.343639	0.109601	8.22065e-05	7.59605e-05	7.05969e-05
2.62127	2.51273	2.40353	2.29358	2.18277	2.07098	1.95804	1.84376	1.72788	1.61007	1.48988	1.36669	1.23962	1.10736	0.967693	0.816431	0.644039	0.414814	8.22245e-05	7.59747e-05	7.06083e-05
2.62127	2.51273	2.40353	2.29358	2.18277	2.07098	1.95804	1.84376	1.72788	1.61007	1.48988	1.36669	1.23962	1.10736	0.967693	0.816431	0.644039	0.414814	8.22245e-05	7.59747e-05	7.06083e-05
2.54431	2.43409	2.32314	2.21136	2.09866	1.98489	1.86991	1.7535	1.63544	1.51539	1.39295	1.26753	1.13834	1.00419	0.863136	0.711721	0.542352	0.328656	8.22147e-05	7.59669e-05	7.0602e-05
2.62127	2.51273	2.40353	2.29358	2.18277	2.07098	1.95804	1.84376	1.72788	1.61007	1.48988	1.36669	1.23962	1.10736	0.967693	0.816431	0.644039	0.414814	8.22245e-05	7.59747e-05	7.06083e-05
2.62127	2.51273	2.40353	2.29358	2.18277	2.07098	1.95804	1.84376	1.72788	1.61007	1.48988	1.36669	1.23962	1.10736	0.967693	0.816431	0.644039	0.414814	8.22245e-05	7.59747e-05	7.06083e-05
2.62127	2.51273	2.40353	2.29358	2.18277	2.07098	1.95804	1.84376	1.72788	1.61007	1.48988	1.36669	1.23962	1.10736	0.967693	0.816431	0.644039	0.414814	8.22245e-05	7.59747e-05	7.06083e-05
2.62127	2.51273	2.40353	2.29358	2.18277	2.07098	1.95804	1.84376	1.72788	1.61007	1.48988	1.36669	1.23962	1.10736	0.967693	0.816431	0.644039	0.414814	8.22245e-05	7.59747e-05	7.06083e-05
2.62127	2.51273	2.40353	2.29358	2.18277	2.07098	1.95804	1.84376	1.72788	1.61007	1.48988	1.36669	1.23962	1.10736	0.967693	0.816431	0.644039	0.414814	8.22245e-05	7.59747e-05	7.06083e-05
2.54431	2.43409	2.32314	2.21136	2.09866	1.98489	1.86991	1.7535	1.63544	1.51539	1.39295	1.26753	1.13834	1.00419	0.863136	0.711721	0.542352	0.328656	8.22147e-05	7.59669e-05	7.0602e-05
2.32591	2.21166	2.09653	1.98044	1.86328	1.7449	1.62516	1.50386	1.38077	1.25559	1.12793	0.997293	0.862976	0.723982	0.578753	0.424588	0.255888	0.0553785	8.22023e-05	7.59571e-05	7.05941e-05
2.43447	2.32151	2.20766	2.09281	1.97683	1.85957	1.74084	1.62041	1.49799	1.37321	1.24557	1.11442	0.978819	0.837375	0.687856	0.526221	0.343639	0.109601	8.22065e-05	7.59605e-05	7.05969e-05
2.48566	2.37439	2.26237	2.14949	2.03565	1.92072	1.80455	1.68693	1.56764	1.44635	1.32266	1.19602	1.06563	0.930545	0.789035	0.637802	0.469938	0.261493	8.22098e-05	7.5963e-05	7.05988e-05
2.43447	2.32151	2.20766	2.09281	1.97683	1.85957	1.74084	1.62041	1.49799	1.37321	1.24557	1.11442	0.978819	0.837375	0.687856	0.526221	0.343639	0.109601	8.22065e-05	7.59605e-05	7.05969e-05
2.62127	2.51273	2.40353	2.29358	2.18277	2.07098	1.95804	1.84376	1.72788	1.61007	1.48988	1.36669	1.23962	1.10736	0.967693	0.816431	0.644039	0.414814	8.22245e-05	7.59747e-05	7.06083e-05
1.90304	1.7748	1.64447	1.51174	1.37625	1.23756	1.09509	0.948081	0.79555	0.636111	0.467775	0.28753	0.0910432	0.0011638	0.000424029	0.000253944	0.000177141	0.000130578	8.21926e-05	7.59499e-05	7.05886e-05
2.62127	2.51273	2.40353	2.29358	2.18277	2.07098	1.95804	1.84376	1.72788	1.61007	1.48988	1.36669	1.23962	1.10736	0.967693	0.816431	0.644039	0.414814	8.22245e-05	7.59747e-05	7.06083e-05
2.62127	2.51273	2.40353	2.29358	2.18277	2.07098	1.95804	1.84376	1.72788	1.61007	1.48988	1.36669	1.23962	1.10736	0.967693	0.816431	0.644039	0.414814	8.22245e-05	7.59747e-05	7.06083e-05
2.62127	2.51273	2.40353	2.29358	2.18277	2.07098	1.95804	1.84376	1.72788	1.61007	1.48988	1.36669	1.23962	1.10736	0.967693	0.816431	0.644039	0.414814	8.22245e-05	7.59747e-05	7.06083e-05
2.54431	2.43409	2.32314	2.21136	2.09866	1.98489	1.86991	1.7535	1.63544	1.51539	1.39295	1.26753	1.13834	1.00419	0.863136	0.711721	0.542352	0.328656	8.22147e-05	7.59669e-05	7.0602e-05
2.62127	2.51273	2.40353	2.29358	2.18277	2.07098	1.95804	1.84376	1.72788	1.61007	1.48988	1.36669	1.23962	1.10736	0.967693	0.816431	0.644039	0.414814	8.22245e-05	7.59747e-05	7.06083e-05
2.62127	2.51273	2.40353	2.29358	2.18277	2.07098	1.95804	1.84376	1.72788	1.61007	1.48988	1.36669	1.23962	1.10736	0.967693	0.816431	0.644039	0.414814	8.22245e-05	7.59747e-05	7.06083e-05
4.33266	4.303	4.27125	4.23715	4.2004	4.16064	4.1174	4.07015	4.01817	3.96058	3.89619	3.82339	3.73985	3.64234	3.52541	3.37888	3.18032	2.84824	0.30099	0.300933	0.300884
4.07201	4.03848	4.00283	3.96481	3.92414	3.88049	3.83346	3.78255	3.72715	3.66649	3.59956	3.52501	3.44097	3.3447	3.23186	3.09476	2.91682	2.64141	0.300827	0.300781	0.300742
3.47029	3.43312	3.39415	3.3532	3.31008	3.26456	3.21638	3.16522	3.11069	3.05229	2.98942	2.92126	2.84669	2.76415	2.67116	2.56342	2.4319	2.24636	0.300632	0.300599	0.300572
3.68267	3.64691	3.60927	3.56957	3.52759	3.48308	3.43575	3.38525	3.33113	3.27285	3.20973	3.14086	3.065	2.98037	2.88425	2.7719	2.63345	2.4365	0.300693	0.300654	0.300622
3.88294	3.84753	3.81002	3.77021	3.72783	3.68257	3.63406	3.58185	3.52536	3.46391	3.39655	3.32206	3.23869	3.14448	3.03577	2.9055	2.73928	2.48752	0.300745	0.300704	0.300671
3.72426	3.68498	3.64338	3.59922	3.55221	3.502	3.44817	3.39023	3.32756	3.25936	3.18462	3.10198	3.00953	2.90453	2.78261	2.63599	2.4479	2.16063	0.30069	0.300655	0.300627
3.40581	3.36571	3.32358	3.27922	3.23241	3.18289	3.13034	3.0744	3.01461	2.95041	2.88107	2.80565	2.72287	2.63089	2.5269	2.40599	2.25794	2.04935	0.30062	0.300589	0.300564
3.23692	3.19807	3.15744	3.11487	3.07018	3.02315	2.97354	2.92105	2.86531	2.80587	2.74216	2.67344	2.59868	2.51646	2.42456	2.31915	2.19231	2.01819	0.300589	0.300559	0.300536
3.42706	3.38801	3.34701	3.30388	3.25838	3.21029	3.15928	3.10502	3.04705	2.98483	2.91764	2.84457	2.76432	2.67507	2.57392	2.45576	2.30971	2.09845	0.30061	0.300581	0.300558
3.03224	2.99162	2.94922	2.90487	2.8584	2.80961	2.75824	2.70401	2.64655	2.58544	2.5201	2.44981	2.37358	2.28998	2.19684	2.09036	1.96267	1.78786	0.300538	0.300516	0.300499
2.44546	2.40878	2.37089	2.33169	2.29108	2.24895	2.20513	2.15948	2.11176	2.06173	2.00906	1.9533	1.89386	1.82987	1.75999	1.68185	1.59039	1.46858	0.300475	0.300458	0.300444
3.19896	3.15889	3.11697	3.07303	3.02688	2.97832	2.92706	2.8728	2.81516	2.75366	2.68771	2.61651	2.53898	2.45358	2.35793	2.24785	2.11452	1.9283	0.300576	0.300549	0.300527
2.43568	2.39858	2.36023	2.32055	2.27943	2.23674	2.19235	2.14606	2.09768	2.04694	1.99351	1.93693	1.87662	1.81172	1.74089	1.6618	1.56951	1.44756	0.300475	0.300458	0.300444
2.3594	2.29873	2.23465	2.16676	2.09458	2.0175	1.9348	1.84552	1.74841	1.64179	1.52326	1.38926	1.23433	1.12031	1.04535	0.96156	0.862565	0.726463	0.30046	0.300449	0.30044
2.75919	2.71777	2.67467	2.62976	2.58287	2.53382	2.48239	2.42831	2.37127	2.31088	2.24661	2.17781	2.10356	2.02255	1.93273	1.83047	1.70804	1.53905	0.300502	0.300484	0.300469
2.36942	2.33035	2.28994	2.24808	2.20465	2.15951	2.11251	2.06345	2.01209	1.95815	1.90124	1.84089	1.77642	1.70687	1.63075	1.54543	1.4454	1.31203	0.300456	0.300442	0.300431
2.41278	2.37524	2.33645	2.29629	2.25468	2.21146	2.16651	2.11962	2.07059	2.01912	1.96487	1.90736	1.84593	1.77966	1.70706	1.62548	1.52926	1.39893	0.300462	0.300447	0.300436

## Sheet: figure1(b)
3.75172	3.63481	3.53987	3.42073	3.29405	3.19332	3.08681	2.95269	2.83092	2.71264	2.59001	2.45932	2.33587	2.18744	2.04462	1.88592	1.74474	1.50574	0.0377473	0.0405064	0.0632079
3.7215	3.61519	3.50164	3.38799	3.27262	3.15677	3.0595	2.91941	2.80403	2.68125	2.55333	2.44707	2.28234	2.15908	2.02344	1.84312	1.69404	1.42968	0.0465469	0.0623221	0.03987
3.67973	3.57031	3.45897	3.34642	3.23521	3.11597	3.01078	2.87614	2.75379	2.62961	2.52358	2.40778	2.24967	2.12728	1.99561	1.83695	1.67835	1.41108	0.0370054	0.0616767	0.050276
3.65336	3.55718	3.42748	3.32993	3.21162	3.08521	2.97783	2.86225	2.72802	2.61007	2.50512	2.36219	2.24141	2.09732	1.977	1.7746	1.65306	1.36404	0.0461004	0.0483458	0.0404833
3.53079	3.41084	3.31602	3.1918	3.06177	2.96053	2.83709	2.71532	2.59821	2.48464	2.34837	2.22616	2.08498	1.96262	1.80404	1.63162	1.47236	1.21598	0.0490822	0.0415768	0.0552233
3.43643	3.32578	3.22021	3.10928	3.0049	2.87277	2.77623	2.65998	2.5324	2.3947	2.27175	2.1602	2.04448	1.87145	1.74879	1.60804	1.4214	1.14243	0.0393332	0.0301715	0.0387349
3.43748	3.31849	3.21291	3.09561	2.97395	2.86627	2.74943	2.628	2.53213	2.38617	2.27257	2.15069	2.00395	1.86502	1.71732	1.5667	1.41048	1.12472	0.0417184	0.0399286	0.0230315
3.33236	3.21496	3.10886	2.9988	2.87329	2.76459	2.64587	2.52895	2.4116	2.29777	2.15052	2.02999	1.89651	1.76394	1.62727	1.43529	1.27013	1.0392	0.0419542	0.0612631	0.0440047
3.33272	3.22029	3.1119	2.9856	2.88162	2.7462	2.64252	2.52979	2.41995	2.27909	2.16466	2.03918	1.88746	1.76947	1.61718	1.45871	1.27027	1.04976	0.0550935	0.0293683	0.0338322
3.22082	3.10564	2.97895	2.87081	2.75717	2.64791	2.5339	2.40345	2.27613	2.15882	2.03534	1.90609	1.74966	1.62714	1.4888	1.34973	1.13651	0.874298	0.0376864	0.0398544	0.0224677
3.19276	3.08059	2.98731	2.87362	2.74691	2.64011	2.52721	2.40733	2.29186	2.16137	2.01354	1.93346	1.78812	1.62497	1.51767	1.33763	1.15951	0.906906	0.0327707	0.0418707	0.038292
3.19821	3.08237	2.97889	2.86297	2.75319	2.63103	2.52203	2.39564	2.27751	2.15519	2.03052	1.92136	1.77703	1.62809	1.49242	1.29649	1.17607	0.85503	0.051123	0.0369008	0.0330052
3.21886	3.10477	2.98266	2.88479	2.78803	2.64436	2.53533	2.44336	2.29851	2.18856	2.05754	1.92769	1.78315	1.65559	1.51926	1.32337	1.20461	0.892779	0.046988	0.0305043	0.041739
3.04984	2.92116	2.81432	2.70662	2.58669	2.44715	2.34462	2.20531	2.10733	1.95964	1.81326	1.65519	1.53833	1.4032	1.25762	1.08328	0.910002	0.602439	0.0496634	0.0506943	0.036895
3.23067	3.10896	3.00896	2.88882	2.76425	2.68243	2.56252	2.44805	2.31344	2.19551	2.07469	1.93228	1.82597	1.68309	1.53465	1.39034	1.24942	0.952531	0.0197559	0.0376777	0.038609
3.17685	3.06331	2.94793	2.83271	2.72631	2.59715	2.49526	2.37902	2.26167	2.12291	2.01586	1.8979	1.75753	1.61979	1.47889	1.3124	1.1496	0.899768	0.0405497	0.0381775	0.0333274
3.1628	3.04066	2.94043	2.83483	2.72498	2.60836	2.49554	2.35247	2.26074	2.10525	1.99561	1.86123	1.7125	1.59713	1.46085	1.31153	1.11407	0.888672	0.0387014	0.0552433	0.0381851
3.11222	2.99627	2.89152	2.78127	2.67032	2.52767	2.44287	2.31153	2.18274	2.08504	1.95683	1.79949	1.70277	1.52825	1.40692	1.25043	1.0794	0.762075	0.0314938	0.038742	0.0366045
3.02369	2.91691	2.79911	2.68653	2.56421	2.45029	2.32478	2.24229	2.13239	2.00942	1.89305	1.74399	1.63654	1.48435	1.36388	1.17898	0.984824	0.758127	0.0430541	0.0313528	0.0147514
2.87793	2.76163	2.65514	2.54118	2.41955	2.31197	2.18736	2.04897	1.94898	1.8082	1.70251	1.58526	1.41316	1.29038	1.18378	1.01011	0.848544	0.555657	0.0285365	0.0510773	0.0219208
2.98076	2.86984	2.75444	2.66015	2.53326	2.40778	2.31331	2.20763	2.08984	1.95085	1.86358	1.70728	1.58413	1.49043	1.26671	1.13669	1.0179	0.684503	0.0244246	0.044072	0.0289311
2.98342	2.86473	2.77242	2.65519	2.54848	2.42322	2.31439	2.19533	2.09449	1.94654	1.8556	1.7043	1.57146	1.46321	1.29939	1.15651	0.994965	0.759111	0.0286819	0.053702	0.0333234
3.01959	2.91257	2.81752	2.68125	2.57674	2.45049	2.3478	2.2228	2.11498	2.01537	1.86641	1.74908	1.62133	1.48581	1.34231	1.18353	0.990302	0.73508	0.0328433	0.0330658	0.0228556
2.96226	2.86719	2.72532	2.63502	2.51328	2.41572	2.28951	2.16893	2.04364	1.91765	1.79717	1.69453	1.53047	1.38931	1.23944	1.09153	0.899997	0.649047	0.0288774	0.0226216	0.028106
3.01312	2.90799	2.80685	2.68657	2.57436	2.45221	2.34962	2.23907	2.12277	2.00683	1.87105	1.75633	1.6158	1.48498	1.31635	1.16327	0.999227	0.728165	0.036628	0.0199972	0.0262306
3.00428	2.89231	2.79658	2.68509	2.57645	2.45363	2.34034	2.22765	2.11604	2.00192	1.87219	1.73153	1.60117	1.48866	1.32561	1.15453	0.999327	0.72883	0.0391204	0.0524637	0.0398592
3.02211	2.91672	2.7938	2.67961	2.57612	2.44779	2.34499	2.21711	2.13516	2.00421	1.86153	1.73487	1.61167	1.48896	1.32948	1.17024	0.989306	0.748785	0.024525	0.0450309	0.0190148
3.02385	2.9158	2.79748	2.68508	2.57284	2.45624	2.33223	2.23963	2.10796	2.00544	1.89303	1.75909	1.60984	1.47045	1.33674	1.15802	1.01309	0.688679	0.059101	0.0278251	0.040576
2.91679	2.80294	2.696	2.57493	2.46385	2.3344	2.22828	2.10113	1.99112	1.88507	1.73981	1.64616	1.52061	1.37498	1.22789	1.03711	0.912374	0.610806	0.0319172	0.0335089	0.0288753
3.01273	2.89606	2.80375	2.69975	2.56909	2.44876	2.34464	2.22055	2.1151	2.00783	1.87666	1.75999	1.61149	1.46226	1.32811	1.1587	0.990999	0.708233	0.0300572	0.031333	0.0464633
2.92394	2.81728	2.69532	2.56866	2.46558	2.34614	2.23204	2.10242	1.99022	1.8835	1.75693	1.61431	1.50563	1.32696	1.21052	1.03583	0.892971	0.63285	0.0314562	0.0185293	0.0416664
3.02246	2.89999	2.80313	2.67608	2.5749	2.46207	2.33631	2.22055	2.11221	1.99346	1.86499	1.73359	1.58214	1.47727	1.32317	1.18054	0.99961	0.722457	0.0417548	0.0260007	0.0303519
2.62578	2.4949	2.41376	2.29415	2.1851	2.0694	1.97022	1.85515	1.72334	1.58535	1.50528	1.32685	1.23043	1.12487	0.949674	0.82463	0.641247	0.310963	0.0661047	0.0556931	0.0337158
2.60978	2.52347	2.40635	2.30532	2.1846	2.06412	1.96251	1.84342	1.73017	1.62616	1.48958	1.38546	1.22024	1.09775	0.962514	0.782337	0.669383	0.347527	0.0349498	0.0388021	0.033059
2.61314	2.53197	2.40438	2.30126	2.17477	2.06765	1.93073	1.83028	1.70823	1.60164	1.50559	1.34886	1.23789	1.09135	0.946721	0.815473	0.647091	0.363378	0.0429661	0.0333698	0.0302395
2.54345	2.4322	2.31886	2.2206	2.08125	1.99383	1.87826	1.74435	1.62147	1.53432	1.40798	1.27457	1.14011	1.0292	0.883282	0.696746	0.566919	0.282578	0.0371382	0.0258559	0.0505766
2.6249	2.50078	2.39092	2.29033	2.19084	2.06263	1.95214	1.8344	1.73381	1.62954	1.48149	1.38601	1.23472	1.11104	0.939538	0.847429	0.659624	0.190776	0.0287628	0.0314388	0.0458715
2.60913	2.50326	2.40751	2.28598	2.1877	2.0477	1.97334	1.83745	1.711	1.62683	1.47935	1.36076	1.26531	1.08817	0.957484	0.823362	0.617539	0.291822	0.0408573	0.0559382	0.0199031
2.60865	2.5275	2.41127	2.28191	2.16562	2.07942	1.97528	1.82011	1.73418	1.61675	1.4837	1.35601	1.2184	1.11609	0.958903	0.844676	0.664178	0.288291	0.0287427	0.0308419	0.0215665
2.44468	2.33401	2.21052	2.09637	1.96145	1.84786	1.74747	1.63094	1.51913	1.36053	1.24664	1.099	0.9785	0.828536	0.647928	0.50525	0.391559	0.13395	0.0515772	0.0242094	0.0385577
2.61797	2.52025	2.41877	2.30177	2.18806	2.07635	1.97577	1.81839	1.7322	1.61825	1.49786	1.40249	1.23724	1.10646	0.975583	0.805109	0.671957	0.0488109	0.0357067	0.0629806	0.0146366
2.61817	2.52176	2.39342	2.31391	2.1935	2.04867	1.96188	1.8432	1.73043	1.59	1.48581	1.35542	1.22001	1.09151	0.967628	0.823326	0.653671	0.325002	0.0325045	0.0456605	0.0425621
2.54653	2.42336	2.33163	2.20234	2.09165	1.97281	1.86296	1.75858	1.62313	1.50568	1.37792	1.25352	1.1345	1.00265	0.862257	0.680867	0.539287	0.192476	0.0379503	0.03123	0.0305592
2.62951	2.51721	2.40008	2.28779	2.19283	2.06145	1.94642	1.82949	1.72083	1.6147	1.4867	1.34798	1.23231	1.09461	0.982534	0.821642	0.66688	0.420649	0.0248973	0.0292953	0.0310156
2.60761	2.51616	2.39496	2.28235	2.1812	2.06531	1.93651	1.84431	1.7381	1.63422	1.49682	1.38234	1.21324	1.10751	0.928239	0.786653	0.577538	0.432549	0.0412354	0.0373062	0.0283318
2.62602	2.50577	2.40604	2.30094	2.1681	2.06206	1.96515	1.85046	1.74313	1.61813	1.50554	1.35565	1.23115	1.10233	0.97322	0.818986	0.670174	0.380799	0.0422041	0.0232735	0.022751
2.6333	2.51241	2.40523	2.28874	2.17661	2.08234	1.94377	1.81597	1.73635	1.60354	1.48535	1.35501	1.21014	1.09769	0.923563	0.79225	0.652391	0.279235	0.0563783	0.0342745	0.020656
2.63355	2.52472	2.40167	2.27945	2.16417	2.07432	1.94828	1.84364	1.7452	1.63348	1.50163	1.36094	1.20771	1.09472	0.967749	0.769834	0.612013	0.115863	0.0286094	0.0363769	0.0281556
2.53651	2.42844	2.33323	2.21078	2.08462	1.9737	1.88331	1.75253	1.62871	1.52471	1.40827	1.24853	1.12274	1.04042	0.866993	0.631434	0.557357	0.121569	0.0141713	0.0443983	0.0385844
2.32335	2.20269	2.09292	1.99384	1.84961	1.76063	1.60456	1.51129	1.37121	1.29325	1.10708	0.977191	0.822667	0.696106	0.581581	0.223568	0.23934	0.104598	0.0245919	0.0267489	0.0291723
2.43947	2.31277	2.21518	2.0827	1.99146	1.88512	1.73468	1.62878	1.46898	1.36347	1.24784	1.07263	0.947937	0.762608	0.718391	0.54959	0.397572	0.254027	0.0386104	0.0173478	0.0538099
2.49955	2.35505	2.26854	2.13466	2.04452	1.89181	1.79085	1.67933	1.58359	1.43297	1.31506	1.20955	1.0768	0.934185	0.827636	0.535218	0.517212	0.2471	0.0376148	0.0281355	0.0362289
2.43119	2.32222	2.20054	2.09333	1.95798	1.8375	1.72299	1.62717	1.51304	1.37946	1.24707	1.13918	0.949742	0.836017	0.715187	0.314209	0.420041	0.128192	0.0367785	0.039127	0.0342944
2.60927	2.51162	2.4178	2.27915	2.1766	2.0607	1.95772	1.82698	1.72295	1.63868	1.50096	1.35318	1.25085	1.09536	0.942169	0.825711	0.589478	0.37583	0.030809	0.036675	0.0144417
1.8957	1.76262	1.6579	1.47048	1.36622	1.19692	1.11292	0.961243	0.863759	0.587181	0.456978	0.204716	0.0762546	0.0779503	0.0514857	0.0692045	0.0583707	0.0461492	0.0425239	0.0293868	0.0296673
2.62246	2.51555	2.39991	2.29238	2.17841	2.0533	1.95806	1.84646	1.74647	1.61339	1.47426	1.34751	1.23491	1.10528	0.980247	0.828215	0.595747	0.319311	0.0285328	0.0365308	0.023536
2.62107	2.5196	2.39026	2.28009	2.19854	2.06463	1.93171	1.85476	1.73379	1.62699	1.49601	1.36998	1.2346	1.12044	0.964766	0.76203	0.640687	0.385215	0.0373001	0.0438269	0.0458069
2.62677	2.51132	2.41408	2.29218	2.17319	2.06616	1.97621	1.85112	1.73098	1.62076	1.49909	1.33878	1.20984	1.097	0.975423	0.789911	0.687807	0.138247	0.0223987	0.017762	0.0233938
2.54416	2.42077	2.31846	2.2117	2.08342	1.97714	1.86946	1.76575	1.63263	1.5376	1.38409	1.29164	1.13775	1.00635	0.816499	0.70415	0.46475	0.216867	0.0284917	0.0275405	0.0429098
2.6099	2.52136	2.41371	2.30521	2.19015	2.04886	1.95136	1.85126	1.7206	1.62598	1.47129	1.31509	1.24017	1.07158	0.970639	0.773946	0.686854	0.237451	0.0307482	0.0342444	0.0204883
2.62627	2.49954	2.40409	2.28901	2.17525	2.08683	1.95492	1.82379	1.72182	1.60211	1.45459	1.37666	1.24284	1.11413	0.927978	0.770287	0.648868	0.209742	0.0253231	0.0389441	0.0319706
4.3307	4.29882	4.2668	4.23608	4.19606	4.14873	4.11872	4.07161	4.022	3.97277	3.89439	3.82113	3.73041	3.63119	3.51431	3.36249	3.17014	2.69944	0.446624	0.524317	0.481078
4.06755	4.03492	3.99531	3.96158	3.92431	3.87083	3.84321	3.77634	3.7302	3.66077	3.5992	3.5301	3.43251	3.3403	3.22923	3.06706	2.89778	2.53764	0.432675	0.269303	0.510698
3.45545	3.43258	3.39556	3.35506	3.30929	3.26087	3.21654	3.15179	3.12015	3.03626	2.98329	2.91182	2.84667	2.75056	2.66936	2.55634	2.4325	2.19449	0.323874	0.313263	0.351441
3.69084	3.64684	3.60385	3.56285	3.52614	3.47602	3.44282	3.38248	3.30527	3.27302	3.20657	3.13179	3.0477	2.95995	2.88376	2.75465	2.6277	2.37133	0.348621	0.288618	0.35714
3.88512	3.83067	3.81131	3.774	3.72903	3.68196	3.6478	3.58627	3.53382	3.45162	3.38638	3.32675	3.23092	3.13982	3.03316	2.89273	2.77104	2.43931	0.463556	0.503628	0.414174
3.72655	3.68662	3.64465	3.60623	3.55658	3.49655	3.44284	3.39332	3.32363	3.25097	3.1753	3.10822	3.00008	2.89016	2.78691	2.60084	2.46161	2.14411	0.372888	0.296827	0.445893
3.3917	3.36335	3.32527	3.29114	3.2264	3.19117	3.12926	3.0618	3.00669	2.94793	2.87373	2.80863	2.70644	2.62161	2.52231	2.36198	2.25465	2.01619	0.292608	0.421723	0.391014
3.23383	3.19598	3.14853	3.11144	3.07158	3.023	2.97459	2.90785	2.85875	2.80675	2.74476	2.67227	2.5958	2.50624	2.41163	2.3025	2.18717	1.9651	0.316755	0.266652	0.276426
3.42828	3.38534	3.33691	3.31366	3.26092	3.20496	3.1592	3.11131	3.05588	2.98685	2.91583	2.84133	2.75325	2.68681	2.57543	2.43648	2.31004	2.06382	0.447524	0.40759	0.366072
3.03268	2.98995	2.94726	2.91606	2.8489	2.81715	2.7578	2.6916	2.6535	2.58577	2.5223	2.43521	2.35345	2.28743	2.19391	2.10271	1.9591	1.74801	0.384082	0.314596	0.321186
2.45084	2.39669	2.35933	2.31405	2.26777	2.23365	2.19618	2.15616	2.09158	2.05342	2.00205	1.94112	1.88406	1.81807	1.72406	1.66748	1.57176	1.43587	0.302349	0.36573	0.376352
3.1892	3.16962	3.10624	3.07937	3.01944	2.97296	2.92354	2.86166	2.80666	2.74464	2.68419	2.60522	2.52339	2.45223	2.36166	2.25257	2.12302	1.86973	0.0398174	0.394503	0.197
2.42798	2.39775	2.36155	2.32073	2.27144	2.23996	2.19238	2.14508	2.11249	2.06017	1.96498	1.93054	1.86364	1.80556	1.72628	1.65838	1.58302	1.40444	0.361875	0.423863	0.301295
2.33901	2.27389	2.22351	2.14021	2.07758	1.98202	1.95112	1.85031	1.78286	1.61854	1.50136	1.37634	1.24469	1.12504	1.04129	1.04123	0.880194	0.636436	0.409278	0.36768	0.352143
2.74879	2.70107	2.67376	2.63561	2.59416	2.53155	2.5076	2.42794	2.37083	2.32329	2.24574	2.17207	2.11175	1.99661	1.93749	1.82014	1.69181	1.48537	0.289376	0.290441	0.32728
2.36773	2.31677	2.30105	2.22915	2.2022	2.15305	2.10927	2.06924	2.01468	1.95957	1.90468	1.86448	1.77891	1.7102	1.61642	1.53983	1.41055	1.28971	0.28254	0.309992	0.249363
2.42711	2.37402	2.32834	2.29783	2.26098	2.2141	2.15757	2.11766	2.07403	1.99611	1.97666	1.90743	1.83553	1.7713	1.72306	1.60143	1.55545	1.35747	0.44871	0.269414	0.24021

## Sheet: figure1(c)
3.56438	3.71139	3.40309	3.25315	3.23854	3.10142	2.87129	2.86372	2.73657	2.47688	2.48716	2.42573	2.07517	1.96475	0.00209784	0.00117404	0.000728716	0.00170746	0.00140091	0.00190606	0.00191576
3.70344	3.46466	3.3338	3.27412	3.22432	2.96458	2.91659	2.61978	2.69197	2.59885	2.49667	2.25135	2.08247	1.82615	0.0231497	0.00350652	0.00168344	0.000877576	0.000750794	0.00238657	0.000720113
3.5497	3.54403	3.39215	3.19925	3.15158	2.96096	2.93606	2.79547	2.8284	2.38039	2.36899	2.31009	2.20679	1.70466	0.00108946	0.00262428	0.00131252	0.00189155	0.00278394	0.0118443	0.00512264
3.41468	3.55326	3.25293	3.1991	3.08871	2.99767	2.87589	2.70171	2.61728	2.50196	2.24533	2.44097	1.93644	1.64935	0.00720918	0.0046345	0.00262552	0.0045604	0.00280871	0.00367547	0.00317142
3.5991	3.39077	2.97877	3.04778	2.93339	2.85888	2.68823	2.55963	2.54972	2.32524	2.2241	2.12848	1.92855	1.69317	0.00240167	0.000943852	0.00318478	0.00158817	0.00865353	0.00582539	0.0074699
3.408	3.35102	3.19223	3.02027	2.78842	2.76663	2.67485	2.47196	2.41951	2.21577	2.01941	1.88371	1.75501	1.48869	0.00187415	0.016337	0.00560144	0.000483758	0.000636744	0.00739227	0.000523953
3.27227	3.27674	3.04655	3.03033	2.86049	2.8469	2.64111	2.53935	2.34818	2.27735	2.05162	2.03792	1.91793	1.62046	0.00819604	0.00424705	0.00039012	0.00304458	0.00818198	0.00176645	0.00477953
3.2659	3.23511	2.97003	2.93281	2.76283	2.65048	2.47896	2.45599	2.233	2.19813	1.9196	1.82567	1.56827	1.27224	0.00100397	0.0031113	0.00259985	0.00314351	0.00204162	0.00152981	0.00844589
3.26477	3.08428	2.99762	2.91014	2.84155	2.73248	2.6043	2.42375	2.34023	2.05759	1.96501	1.97125	1.76614	1.50421	0.00271397	0.0124764	0.00348459	0.00237078	0.00192712	0.00413803	0.00482585
3.19347	2.97292	2.87695	2.63819	2.74465	2.48492	2.38821	2.25014	2.21463	2.03773	1.88685	1.71034	1.54926	1.3027	0.00350042	0.00239058	0.00198597	0.00214266	0.00217653	0.00152884	0.00167033
3.15525	3.13283	2.93167	2.7966	2.73729	2.6189	2.39882	2.24626	2.30054	2.01283	1.90203	1.66996	1.56783	1.15226	0.000990324	0.00106138	0.00244294	0.00396641	0.00395975	0.000889403	0.0242954
3.22468	3.09733	2.90662	2.70429	2.56949	2.60081	2.47584	2.40983	1.91403	1.88263	1.92121	1.19619	1.62235	1.34586	0.0352926	0.00027538	0.000997917	0.0077589	0.00252082	0.001219	0.00275771
3.11199	3.12459	2.81518	2.80937	2.67141	2.56149	2.38257	2.38605	2.13665	1.91264	1.95395	1.89435	1.60151	1.28343	0.00258109	0.00599173	0.00203051	0.003276	0.00121144	0.0102957	0.00132295
2.93171	2.77693	2.66997	2.69946	2.37316	2.39343	2.38191	1.98194	1.9403	1.84748	1.40412	1.37791	1.09675	1.3066	0.00160939	0.00304652	0.00300876	0.00138161	0.000314931	0.00255345	0.000592098
3.1364	3.16553	2.96835	2.75807	2.8162	2.54774	2.44773	2.34212	2.13631	2.08674	2.00533	1.78014	1.64254	1.41074	0.00479049	0.000576596	0.00322055	0.000476067	0.000837788	0.000828385	0.000943309
3.124	3.07622	2.80985	2.74716	2.79377	2.42056	2.1946	2.18944	2.02556	1.92994	1.81268	1.68841	1.48695	1.15975	0.0405579	0.000679929	0.00117102	0.00371442	0.000863511	0.00829041	0.00420159
3.09826	3.06444	2.93866	2.76181	2.62095	2.46341	2.46182	2.25846	2.19067	1.86868	1.80125	1.66327	1.52988	1.17025	0.0135824	0.0120172	0.00106362	0.0364734	0.000853834	0.00461978	0.00608197
3.02652	3.13437	2.74557	2.74991	2.58762	2.46171	2.40408	2.21763	1.92745	1.80413	1.93336	1.66739	1.47707	1.15781	0.00320204	0.011423	0.0153565	0.00147291	0.0160075	0.00343479	0.00124998
2.84495	2.82063	2.7447	2.62499	2.49642	2.26289	2.11729	2.14593	1.95505	1.58633	1.62631	1.75757	1.47633	1.11945	0.00675551	0.00256582	0.00792162	0.00601109	0.00421098	0.0042063	0.00752924
2.76709	2.67416	2.4739	2.41157	2.25435	2.18473	1.93641	2.06522	1.85269	1.63725	1.55539	1.4054	0.693694	0.0324141	0.000515082	0.00600503	0.0080823	0.00330264	0.0014102	0.000657008	0.00320441
2.96747	2.76465	2.77679	2.59445	2.50952	2.37175	2.23104	2.07854	1.84369	1.71493	1.87153	1.66358	1.41777	0.0427175	0.00122249	0.00208943	0.000430816	0.00102212	0.00205068	0.00351023	0.000851912
2.87561	2.8419	2.80385	2.491	2.5148	2.37837	2.18132	2.02751	2.00496	1.68626	1.74634	1.65315	1.51453	1.06065	0.00574266	0.00413727	0.000356993	0.00233756	0.00297038	0.00961851	0.0060625
3.03624	2.9828	2.7178	2.60767	2.41615	2.18156	2.25208	2.12462	2.00877	1.93935	1.75951	1.52363	1.28609	1.07769	0.006594	0.00167031	0.00240528	0.000739395	0.00248686	0.00694469	0.00151979
2.83815	2.71028	2.65678	2.62412	2.46999	2.27736	2.04065	2.06983	1.97353	1.81187	1.80266	1.56734	1.23955	1.15734	0.000600777	0.00835314	0.00983598	0.00211874	0.00224971	0.00199961	0.0028306
2.87587	2.94841	2.75539	2.67236	2.4318	2.32947	2.33645	2.12373	2.00236	1.9264	1.72526	1.40918	1.27337	1.22643	0.00752116	0.00190803	0.0018953	0.00410033	0.000713313	0.00854782	0.00231256
2.99453	2.9494	2.84192	2.54236	2.45248	2.43314	2.27901	2.18573	1.88452	1.84344	1.79802	1.39307	1.18245	1.12793	0.00306421	0.00163193	0.00361758	0.010309	0.00947723	0.000215866	0.00239724
2.89589	2.86074	2.63676	2.63584	2.53028	2.41322	2.28635	2.25356	1.82327	1.85732	1.72593	1.55884	1.43829	1.07323	0.00193443	0.0014996	0.0069106	0.00486392	0.00615224	0.000131129	0.000885637
3.08853	2.89138	2.76625	2.59009	2.57661	2.39125	2.28637	2.16431	1.97982	1.77629	1.7256	1.57157	1.38449	1.35051	0.0222127	0.00125086	0.00520706	0.00219229	0.00183878	0.0014464	0.000905916
2.88273	2.66301	2.60802	2.49085	2.41269	2.22508	2.1423	2.02363	1.9907	1.57636	1.45201	1.49539	1.08515	0.916156	0.00147077	0.00322751	0.000598939	0.00334826	0.0023136	0.00610453	0.000826398
3.02509	2.86431	2.79985	2.55921	2.45341	2.56686	2.27786	2.10094	1.8674	1.90627	1.59635	1.57374	1.34484	0.647019	0.0162252	0.00610623	0.0294477	0.000396831	0.00525127	0.00267938	0.00633573
2.85988	2.74752	2.77024	2.47867	2.46004	2.33732	2.17987	2.04065	1.80667	1.75305	1.79954	1.36832	1.30292	0.229671	0.000916059	0.00664209	0.0103469	0.0224564	0.000716409	0.00434073	0.00292972
2.89826	2.88336	2.70397	2.69963	2.51656	2.43103	2.26192	1.99359	2.0237	1.74044	1.69608	1.7319	1.46155	1.09737	0.0100718	0.00178145	0.00193723	0.00221249	0.0167409	0.020703	0.000933657
2.58652	2.49746	2.36073	2.28017	2.07198	2.05956	1.9007	1.53977	1.46436	1.14582	0.944342	1.27681	0.927973	0.130797	0.0129057	0.00859056	0.0234291	0.00169203	0.00177847	0.00297534	0.00125713
2.76016	2.41923	2.3187	2.37906	2.08794	1.79276	1.86535	1.76982	1.56783	1.34851	1.33255	1.32984	0.847137	0.581417	0.000989158	0.0011681	0.00206249	0.000485174	0.00353567	0.00377355	0.00316191
2.48845	2.46402	2.24638	2.385	2.07048	2.0102	1.87534	1.73595	1.64962	1.42013	1.23769	1.26445	0.84313	0.181696	0.00269767	0.00139646	0.00151616	0.000883776	0.0234401	0.00111495	0.00696305
2.56152	2.38033	2.24908	2.00939	1.96941	1.88648	1.8471	1.45571	1.47969	1.19164	1.37291	1.02252	0.893999	0.01058	0.0202316	0.000677828	0.000763688	0.000421361	0.00146933	0.00402049	0.00204087
2.48478	2.44953	2.3793	2.17399	2.20704	1.9642	1.85134	1.71246	1.56586	1.4464	1.27066	1.12724	0.85166	0.481767	0.00176541	0.000842882	0.00103088	0.00213502	0.00149291	0.00457936	0.00114522
2.71222	2.55086	2.26674	2.21756	2.0566	2.03989	1.9151	1.57948	0.906057	1.37871	1.1145	1.23111	0.929814	0.737813	0.0132602	0.00226533	0.00265721	0.00368099	0.00493531	0.00171509	0.00172257
2.64345	2.44243	2.403	2.01976	1.91706	1.95843	1.888	1.78381	1.52386	1.23951	1.21948	1.23569	0.41032	0.788914	0.000498226	0.00142261	0.0031437	0.00726933	0.00194444	0.00188963	0.00194576
2.26489	2.21948	2.12957	2.09489	1.68703	1.73806	1.56548	1.55981	1.31812	0.917167	0.384634	0.180612	0.00329965	0.37328	0.0467548	0.002285	0.00253439	0.000416596	0.00328973	0.00380519	0.00263312
2.6855	2.48305	2.49058	2.27135	1.92992	1.90021	1.82355	1.72495	1.63034	1.45635	1.01728	1.20368	1.00151	0.237334	0.0202478	0.0266581	0.00223986	0.00202018	0.00148553	0.000459941	0.00470532
2.65804	2.55288	2.25513	2.21754	1.98631	2.23357	1.8051	1.75861	1.42433	1.46768	1.23658	0.219315	0.913343	0.0959036	0.00649367	0.00748778	0.00454501	0.00321415	0.00317712	0.00224826	0.00402221
2.47322	2.36174	2.25547	1.95197	2.01043	1.93446	1.92749	1.5	1.3192	1.32421	1.33556	0.842599	0.911018	0.149636	0.0011957	0.00276372	0.00265154	0.000769027	0.00162643	0.0062172	0.00205308
2.53157	2.44681	2.42026	2.18955	1.90566	1.98026	1.88523	1.6892	1.74207	1.31839	1.35746	0.972285	0.550388	0.625649	0.00431071	0.00170484	0.0010335	0.00943816	0.00408447	0.00231446	0.00676305
2.54459	2.35736	2.27982	2.24673	2.21681	1.90576	1.84098	1.61508	1.66783	1.44727	1.42992	0.965048	0.0106215	0.00520667	0.0188113	0.0101441	0.00334465	0.000751842	0.00122394	0.00464151	0.00264657
2.49479	2.55793	2.24226	2.12783	2.11774	2.06586	1.71259	1.55837	1.6719	1.43997	1.38094	1.23296	0.746303	0.121369	0.00173786	0.0045097	0.000512801	0.00213497	0.00237816	0.00146731	0.00445982
2.61287	2.4849	2.27723	2.19617	1.94907	1.9791	1.92447	1.72633	1.53044	1.34399	1.15428	1.27209	0.00461106	0.0462212	0.00559596	0.00211875	0.00660942	0.00257668	0.000345201	0.0150298	0.00244222
2.5172	2.55071	2.32242	2.32126	2.01368	1.96023	1.85388	1.76436	1.45963	1.21148	1.24343	1.12069	0.824657	0.0483637	0.00197459	0.0218964	0.00408982	0.00198441	0.00960594	0.0043925	0.0140616
2.27511	2.34958	2.25884	1.89574	2.03072	1.83479	1.78416	1.67914	1.4637	1.34306	1.11645	1.03301	0.959302	0.00588739	0.00227726	0.00365221	0.0284307	0.00452398	0.00724874	0.00140056	0.0067887
2.28732	2.0869	1.83969	1.84482	1.72839	1.56147	1.48738	1.35208	1.11558	0.911659	0.910147	0.646542	0.0393359	0.00849496	0.010548	0.0100636	0.00233698	0.00691641	0.00185026	0.00113784	0.0131266
2.33844	2.29421	2.17686	2.06537	1.90802	1.70173	1.5388	1.40806	1.32861	1.09133	1.07967	0.992851	0.60254	0.00152701	0.00605516	0.00202743	0.00418448	0.00858895	0.00343035	0.0155922	0.00394435
2.38357	2.43667	2.3703	1.8844	1.90496	1.87229	1.72638	1.22625	1.44205	0.824782	1.28192	0.081573	0.270747	0.269108	0.00636248	0.000383123	0.0028975	0.00234986	0.00272552	0.00358895	0.00061581
2.28997	2.19449	2.08644	1.95366	1.94004	1.79372	1.47465	1.26287	1.485	0.767086	1.13659	1.04612	0.0112682	0.192874	0.00333558	0.0090382	0.00537475	0.00279006	0.00213122	0.000927527	0.00236037
2.69141	2.45197	2.3697	2.21121	2.07791	1.9217	1.87424	1.74446	0.949457	1.23407	0.990998	0.929839	0.582739	0.0957451	0.0032667	0.0123987	0.000773727	0.00213812	0.00148496	0.000692756	0.000533742
1.50246	1.59019	1.36866	1.30583	0.668656	1.07743	0.691882	0.699483	0.00446601	0.0497691	0.0134373	0.0388087	0.00383502	0.0120482	0.000550898	0.00301678	0.0014255	0.00386902	0.000487704	0.00164546	0.00441624
2.61424	2.40169	2.45374	2.21372	2.26252	2.07864	1.85826	1.68604	1.54543	1.46172	1.2932	0.978792	1.00503	0.46666	0.00650825	0.00188204	0.00606756	0.00223549	0.00339231	0.0172606	0.00118917
2.57354	2.44543	2.20159	2.32021	2.01307	1.83514	1.92612	1.70062	1.59645	1.41895	1.26799	1.20905	0.988187	0.0348891	0.00396125	0.0100309	0.0216852	0.0113953	0.00113537	0.0022523	0.000798339
2.54861	2.50815	2.39233	2.23361	2.14673	1.97498	1.97013	1.85187	1.34869	1.32306	1.24515	1.06481	0.935516	0.306254	0.000804916	0.00602566	0.00870024	0.00979174	0.00151492	0.00142226	0.00890778
2.42947	2.41812	2.15089	2.20211	1.98523	1.84506	1.78118	1.64606	1.34309	1.42172	1.23614	0.947106	0.00191051	0.489644	0.0116709	0.00133386	0.0108727	0.000837788	0.0125811	0.00120546	0.00273336
2.62569	2.31524	2.40483	2.29654	2.03438	1.97997	1.77965	1.77703	1.67927	1.48197	1.45237	0.3053	0.863188	0.120353	0.0016912	0.00179918	0.0188799	0.011903	0.000850471	0.0106952	0.00262054
2.57914	2.59375	2.2806	2.22509	1.9508	1.82491	1.74536	1.7314	1.6184	1.54615	1.30964	1.19821	0.481903	0.0452642	0.00225981	0.0178119	0.00141886	0.000945389	0.000857281	0.003743	0.00111245
3.9164	3.98272	3.92167	3.96746	3.88596	3.81165	3.78952	3.84535	3.67091	3.52507	3.57017	3.5049	3.22814	2.8443	0.00253527	0.0546424	0.0565909	0.00287419	0.0929279	0.00468818	0.256678
3.72063	3.72376	3.65619	3.6484	3.64067	3.6507	3.5792	3.59904	3.42305	3.37019	3.32141	3.19446	3.10054	2.77508	0.016923	0.00445175	0.0254905	0.0713727	0.00103694	0.150101	0.0216142
3.32373	3.29816	3.23162	3.19811	3.09993	3.01275	2.95158	2.97535	2.98603	2.83952	2.79618	2.51124	2.56143	2.13395	0.00509721	0.00264449	0.0734604	0.0270813	0.0420624	0.00853471	0.00742475
3.47124	3.4871	3.44477	3.41516	3.4219	3.28311	3.2887	3.16923	3.08346	3.08697	3.00776	2.97462	2.83756	2.50789	0.128711	0.00521314	0.00057071	0.0664255	0.00389933	0.190572	0.200109
3.62641	3.58234	3.58662	3.52589	3.50967	3.48838	3.36198	3.25544	3.22784	3.1386	3.26018	3.05621	3.02775	2.61445	0.0158308	0.00846984	0.0956438	0.00100113	0.00990568	0.0040387	0.00740165
3.47312	3.41235	3.4074	3.44793	3.32943	3.26912	3.21053	3.18025	3.20904	2.94218	2.88594	2.96163	2.71527	2.39074	0.184272	0.0702195	0.0221603	0.00394816	0.00488758	0.153114	0.00595398
3.26969	3.22969	3.18128	3.04074	3.15904	2.97141	2.91557	2.92508	2.90024	2.60767	2.65943	2.47164	2.37042	2.22195	0.00305847	0.347541	0.00731231	0.311133	0.00127488	0.00366795	0.0630462
3.1492	3.13155	2.97174	2.94739	3.05929	2.87148	2.67834	2.77231	2.70291	2.62145	2.51616	2.44537	2.29641	2.18345	0.0409406	0.138356	0.0754468	0.161269	0.0576703	0.0022458	0.0111557
3.27934	3.18076	3.08638	3.0311	3.11934	3.01843	2.98415	2.91209	2.88031	2.7377	2.5505	2.71048	2.50335	2.19507	0.00424968	0.00181414	0.395136	0.00817215	0.0425387	0.234828	0.0863999
2.92582	2.82436	2.76267	2.75612	2.70406	2.66536	2.55314	2.58291	2.34718	2.26288	2.38758	2.23651	2.2119	1.85296	0.0589994	0.00112096	0.0182127	0.0824576	0.0103484	0.0478704	0.0853557
2.2671	2.3709	2.19039	2.08033	2.20251	2.09692	1.96896	2.01051	2.14607	1.75351	1.87186	1.87415	1.5812	1.56947	0.0324969	0.0344088	0.111053	0.0104794	0.00233976	0.166392	0.00809062
2.99006	2.90843	2.92999	2.88325	3.00023	2.93024	2.82802	2.72593	2.73652	2.44718	2.54965	2.46626	2.14444	2.10152	0.0653982	0.00696491	0.136508	0.0524825	0.0115671	0.0921784	0.00232402
2.36845	2.39773	2.22044	2.05767	2.26896	1.95278	2.06795	1.91806	2.01947	1.8995	1.88621	1.66826	1.52825	1.57593	0.0291744	0.00881008	0.0309561	0.188625	0.120629	0.0199138	0.313913
2.08129	2.07368	1.96595	1.99804	1.63902	1.87478	1.74981	1.51471	1.0861	1.38065	1.20723	0.338194	0.804831	0.687191	0.00893831	0.0373617	0.0139027	0.0941977	0.0111717	0.0221315	0.00336493
2.60655	2.59996	2.5153	2.50515	2.46935	2.32909	2.32316	2.30277	2.27933	2.21029	2.19136	1.8962	1.88391	1.69736	0.00761668	0.006884	0.137752	0.00986991	0.224759	0.0201999	0.0071027
2.37604	2.27685	1.98993	2.12814	1.99644	1.99506	1.87332	1.6747	1.95301	1.90781	1.67886	1.56506	1.63382	1.2975	0.0365676	0.00397343	0.142327	0.346277	0.0820312	0.0377913	0.294979
2.15051	2.29111	2.07519	2.22879	2.09616	2.07039	2.08271	1.89524	1.83574	1.88194	1.69488	1.80486	1.46341	1.21702	0.136735	0.00269108	0.010378	0.00480608	0.00242949	0.0301833	0.00247273

## Sheet: figure1(d)
3.66289	3.41068	3.23018	3.29182	3.19226	3.01026	2.86451	2.71543	2.61051	2.44608	2.368	2.23582	1.97021	1.88403	0.100589	0.178118	0.0739208	0.0918588	0.048763	0.0581194	0.0461299
3.62674	3.54325	3.36761	3.33959	2.91233	2.99184	2.88588	2.72976	2.83639	2.52373	2.45748	2.49153	2.08189	1.26149	0.126038	0.0908996	0.271545	0.0690139	0.0553456	0.0556306	0.120469
3.59033	3.46742	3.31684	3.18657	3.08335	2.74972	2.87955	2.771	2.55911	2.47534	2.30325	2.23247	2.13157	1.7228	0.141072	0.0810295	0.152332	0.103608	0.0345716	0.0519144	0.0375073
3.75413	3.4272	3.29529	3.28909	3.07611	2.88855	2.78599	2.74022	2.48661	2.39192	2.44395	2.11222	2.03289	2.00801	0.12027	0.22115	0.103855	0.0494816	0.0381307	0.0669132	0.0420119
3.29673	3.46168	3.16939	3.19806	3.01123	2.89567	2.72224	2.47422	2.34149	2.26854	2.15973	1.95509	1.76668	1.56368	0.109072	0.0758499	0.131323	0.0419754	0.157734	0.0599392	0.0332242
3.42097	3.20408	3.1603	2.79195	2.81785	2.73038	2.81529	2.41096	2.48769	2.1745	2.00455	2.02469	1.54164	1.43998	0.0357592	0.0770322	0.0772796	0.0321768	0.0636888	0.0356054	0.0635514
3.33001	3.13659	3.11221	3.10743	2.78248	2.69436	2.60863	2.50366	2.3017	2.17853	2.04425	2.12918	1.72969	1.13903	0.0656564	0.049649	0.0770096	0.0545771	0.0579269	0.0484461	0.0440007
3.15489	3.17013	2.9144	2.68058	2.67313	2.4249	2.56238	2.3976	2.23892	2.3217	1.89296	1.4201	1.6927	1.28704	0.0403717	0.0370796	0.0647779	0.0788932	0.052071	0.0837224	0.0295317
3.15944	3.0528	3.06767	2.72834	2.67815	2.62866	2.51879	2.41567	2.01918	2.01871	1.75398	1.81007	1.68351	1.32311	0.0485827	0.0491724	0.16944	0.036877	0.0263378	0.0764344	0.0591245
3.02881	2.91643	2.8619	2.65798	2.65799	2.50895	2.40887	2.19555	2.11081	2.11942	1.8347	1.64101	1.67632	1.17267	0.114076	0.0558578	0.117179	0.0570674	0.0658338	0.0207232	0.0258557
3.06803	2.88227	2.82365	2.70088	2.58842	2.37495	2.45429	2.32627	2.28089	1.79128	1.83249	1.54216	1.54879	1.08972	0.0497584	0.0421921	0.0558123	0.0491002	0.0312506	0.0489455	0.0441461
3.10767	2.96715	2.86748	2.73897	2.58222	2.39506	2.50479	2.22611	1.99658	1.79195	1.61459	1.58575	1.40762	1.33813	0.0616581	0.0767404	0.102977	0.0444859	0.0307853	0.0485054	0.0403284
3.14145	2.86356	2.79914	2.86565	2.62433	2.52362	2.42016	2.4275	2.28243	2.00697	1.98251	1.78058	1.62838	1.12823	0.130406	0.0376339	0.0921708	0.0551008	0.0609106	0.0401773	0.0565534
2.87627	2.84121	2.68731	2.54344	2.5147	2.31195	2.22372	1.84784	2.06466	1.87785	1.01154	1.23289	0.487564	0.590682	0.0548576	0.0248802	0.0794632	0.128052	0.0696791	0.0608085	0.0260259
3.29296	3.08523	2.92591	2.70141	2.59955	2.42399	2.56554	2.24386	2.1277	1.99418	1.78225	1.78123	1.50029	1.11747	0.171803	0.035324	0.0631852	0.0591571	0.0497007	0.0440498	0.0362528
3.11901	2.76869	2.85574	2.74338	2.58215	2.61079	2.50286	2.22978	2.14116	2.03508	1.72975	1.81705	1.44406	1.19614	0.0842534	0.0824669	0.0286513	0.151333	0.0507052	0.042329	0.0374007
3.0301	3.00297	2.72531	2.70522	2.52231	2.40903	2.29464	2.33038	2.19285	1.91017	1.65009	1.80651	1.36073	1.27697	0.0563552	0.0658296	0.0419065	0.0624467	0.0571352	0.0812648	0.072839
3.04985	2.96224	2.8702	2.65743	2.42728	2.39285	2.3375	2.2193	2.02802	1.76537	1.74343	1.5923	1.14504	0.707687	0.120071	0.0896283	0.0277768	0.0602278	0.0380504	0.0422444	0.0493737
3.10051	2.7289	2.68367	2.64549	2.4055	2.34047	2.23563	2.07938	2.1002	1.84231	1.49872	1.42001	1.33457	0.712685	0.138751	0.0429747	0.0885787	0.0750159	0.0642445	0.0314525	0.0265535
2.73596	2.70377	2.64674	2.37968	2.21866	2.1583	2.02591	1.995	1.79923	1.74471	1.41144	1.25806	1.28291	0.259704	0.0725169	0.0680287	0.0691998	0.0499003	0.0750675	0.0723704	0.0262127
3.08543	2.85877	2.65723	2.49295	2.37653	2.27799	2.22907	2.15974	2.19713	1.86877	1.85465	1.61033	0.913612	0.932197	0.091169	0.0866237	0.113018	0.08318	0.0377995	0.0786222	0.0396869
2.83443	2.68202	2.73441	2.43402	2.25991	2.26628	2.05303	1.89199	1.61327	1.78895	1.77642	1.59239	1.03748	0.703245	0.0766029	0.0479852	0.0431956	0.0494175	0.0227385	0.0491981	0.0207194
3.02495	2.8118	2.6098	2.5628	2.65282	2.25775	2.17031	2.05692	1.79029	1.76581	1.65554	1.44062	1.33357	0.834273	0.0450752	0.0710053	0.0971644	0.109078	0.0333267	0.0344639	0.0405797
2.91746	2.61387	2.6166	2.34236	2.38036	2.32369	2.0656	2.03689	1.73473	1.69102	1.52249	1.43162	1.24047	0.857918	0.0649705	0.198259	0.0969301	0.0588052	0.046589	0.0799804	0.0479345
3.00962	2.7728	2.57752	2.45982	2.40019	2.38358	2.30228	2.15591	2.04217	1.62954	1.1855	1.57234	1.18288	0.897265	0.0637969	0.117257	0.070721	0.0326638	0.0647043	0.097404	0.0597194
2.9125	2.87287	2.83888	2.60512	2.58051	2.39669	2.12348	2.04658	1.85038	1.74015	1.66137	1.3796	1.25196	0.841992	0.144559	0.0801168	0.0661086	0.078761	0.0728409	0.0268198	0.0525842
2.88964	2.85757	2.85362	2.59179	2.40717	2.43345	2.04802	2.08567	2.07252	1.78463	1.62829	1.62822	1.37179	0.956738	0.0862599	0.0950536	0.0464442	0.0417485	0.0683586	0.0498887	0.0448694
2.77367	2.84537	2.62951	2.59588	2.54115	2.36517	2.2203	2.08432	2.00941	1.95142	1.72412	1.57126	0.802302	0.736429	0.0930701	0.0588231	0.0383506	0.0376433	0.0494448	0.0526376	0.0498841
2.68977	2.69492	2.74947	2.36574	2.34176	2.09974	2.09578	1.86893	1.74271	1.51935	1.1905	1.39711	1.19923	1.06679	0.0480896	0.0468971	0.0571295	0.0606809	0.0801898	0.0354233	0.0232073
3.00573	2.80349	2.69466	2.5315	2.34524	2.29814	2.03593	2.09501	1.67107	1.8544	1.61166	1.6363	1.30521	1.09226	0.0758182	0.0533787	0.0652498	0.0609116	0.0536434	0.0369888	0.0319553
2.61203	2.67908	2.60416	2.436	2.3449	2.26438	2.12296	1.69182	1.85045	1.71714	1.51313	1.52156	0.987702	0.581396	0.0359448	0.0946769	0.0225122	0.0462923	0.0702006	0.0437948	0.0325892
2.84211	2.80224	2.59558	2.70055	2.45942	2.17057	2.14875	1.97943	2.00389	1.86115	1.79585	1.48093	1.30877	1.16341	0.106916	0.123699	0.0581144	0.0514701	0.0236068	0.0411765	0.0320456
2.56511	2.43886	2.56566	2.2311	1.97126	1.89061	1.81083	1.64067	1.7818	1.37711	0.984581	1.2846	0.761178	0.284512	0.0957878	0.0367479	0.0521148	0.0556894	0.0317149	0.0624173	0.04381
2.35262	2.49334	2.36859	2.14962	1.90359	1.97594	1.7884	1.46726	1.74956	1.46985	1.10683	1.1544	0.615549	0.353582	0.0658159	0.0800965	0.059274	0.0722271	0.0796463	0.0445372	0.0194758
2.4764	2.49544	2.40415	2.32917	2.11483	1.78269	1.95092	1.56934	1.60775	1.35901	0.765016	0.939162	0.600282	0.304111	0.0792578	0.0465436	0.06381	0.156874	0.0808168	0.0378316	0.0451058
2.4264	2.32758	2.20026	2.10524	1.86359	1.68698	1.63577	1.55466	1.15717	1.20194	0.567307	1.17969	0.56398	0.280865	0.0538527	0.0435454	0.0565966	0.0462558	0.0444741	0.0501735	0.0283259
2.54437	2.40959	2.20584	1.98293	2.07749	1.90569	1.81555	1.59854	1.52578	1.22577	0.901108	1.07017	0.398193	0.765773	0.0666326	0.0458288	0.053227	0.062801	0.023091	0.00989376	0.055961
2.56674	2.47921	2.38783	2.1965	2.05533	1.9375	1.70241	1.86459	1.62057	1.05982	1.13617	1.05735	0.984653	0.468135	0.0819302	0.146489	0.128631	0.0606852	0.0560427	0.0385776	0.0454552
2.42226	2.38333	2.30904	1.92408	2.03692	1.92276	1.72399	1.23703	1.50616	1.34153	1.05756	0.827663	0.252493	0.327066	0.0833514	0.0863947	0.0556075	0.0369363	0.0460482	0.0499374	0.0338143
2.28775	1.9594	1.84529	2.0684	1.84601	1.57665	1.71991	1.30397	1.37389	0.758947	0.688143	0.686671	0.686383	0.436934	0.0490256	0.0889893	0.0277	0.0710709	0.0305558	0.0693419	0.030097
2.6458	2.35606	2.45684	2.14291	1.97507	2.02058	1.77859	1.78315	1.66318	1.5652	1.40014	1.10602	0.636689	0.662519	0.0786863	0.0813315	0.0416463	0.0346698	0.0433229	0.0387226	0.0407655
2.50409	2.49937	2.39891	2.2719	1.97715	1.92532	1.75872	1.63924	1.29439	1.47117	0.666839	0.989542	0.190398	0.4185	0.070409	0.0420106	0.0642907	0.106616	0.0438322	0.052876	0.0378181
2.38805	2.122	2.16356	2.24947	1.88126	1.8332	1.83463	1.59521	1.55778	1.2711	0.686401	1.03198	0.684674	0.256149	0.0532688	0.071206	0.0451695	0.0743961	0.0246356	0.0348245	0.0302044
2.65211	2.31157	2.29161	2.22265	1.84719	1.79143	1.71472	1.76331	1.62865	1.52418	1.17179	0.882709	1.01337	0.606547	0.0938626	0.0582015	0.0400328	0.107565	0.0629745	0.0352266	0.0362846
2.45552	2.33645	2.19805	2.24224	2.07737	2.01791	1.81206	1.51654	1.60595	1.31857	1.23059	0.748979	0.905134	0.41855	0.111531	0.0459155	0.10083	0.0875524	0.0374553	0.0374004	0.0204908
2.48465	2.40734	2.17196	1.88235	2.02186	1.91963	1.72715	1.66736	1.10938	1.38842	0.92794	1.16948	0.473053	0.674182	0.100041	0.0522665	0.132606	0.0624652	0.0580607	0.0213814	0.0275868
2.56468	1.95723	2.2313	2.11103	1.92018	1.70519	1.76952	1.97435	1.38203	1.52513	1.36345	1.2299	0.337572	0.555197	0.126485	0.0736215	0.181817	0.0455065	0.0397876	0.061861	0.024088
2.56772	2.41844	2.416	2.06199	1.93693	1.83165	1.71787	1.79052	1.43711	1.03188	1.27953	0.801618	0.406091	0.376786	0.0680439	0.0721167	0.0270098	0.0420046	0.0318297	0.0664179	0.0364484
2.28051	2.30196	2.35071	2.11108	1.84915	1.79343	1.67425	1.28925	1.24453	1.22386	0.640878	0.958829	0.830964	0.483051	0.124691	0.0258686	0.0567638	0.0417212	0.0638828	0.0592222	0.0161415
2.18661	2.16237	1.9221	1.93972	1.42494	1.39146	1.36864	1.40724	1.19255	0.803399	0.383842	0.542806	0.24229	0.521338	0.102514	0.133069	0.0811574	0.0402548	0.0523178	0.0580272	0.0624691
2.09791	2.10511	2.18991	1.92118	1.57176	1.66218	1.65772	1.48896	0.807453	0.8501	1.02342	1.04452	0.564278	0.31553	0.0668842	0.0264887	0.0403702	0.0488218	0.0769839	0.0348063	0.0401274
2.3684	2.31016	2.10031	1.83618	1.7665	1.74966	1.51187	1.53831	1.27098	1.24024	0.632563	0.972961	0.722234	0.209023	0.0357279	0.0526552	0.0589927	0.0207576	0.0569815	0.0628358	0.0640253
2.33478	1.99695	1.95936	1.88043	1.77168	1.67653	1.76732	1.00346	1.28159	0.213107	1.15405	0.717868	0.457819	0.284236	0.172117	0.0215453	0.02483	0.0537972	0.0721493	0.0371429	0.0575402
2.62157	2.42354	2.44745	2.13744	2.0384	1.99337	1.8662	1.6917	1.42301	1.43338	1.28385	1.21224	0.770416	0.710337	0.0656649	0.0885946	0.170142	0.040532	0.0797723	0.0911871	0.0204897
1.6983	1.43549	1.16911	0.619432	0.418134	0.505137	0.656253	0.464622	0.150095	0.244457	0.100047	0.0848794	0.185346	0.0562705	0.0330733	0.0350431	0.0298216	0.0207787	0.0482083	0.0517123	0.0634865
2.58282	2.41108	2.4116	2.14521	1.96817	1.83861	1.95616	1.62984	1.65391	1.23844	1.18267	1.07632	1.13312	0.587596	0.103183	0.0994393	0.0408152	0.10998	0.0861553	0.0449312	0.0306405
2.51322	2.45482	2.40698	1.93918	2.02195	1.91733	1.71297	1.71626	1.71702	1.25862	1.08016	0.987179	0.923895	0.858828	0.0409297	0.0702999	0.043831	0.0850693	0.0608771	0.0361436	0.03749
2.588	2.41414	2.30073	1.98216	1.99582	1.7858	1.72047	1.70145	1.30113	1.46213	0.848602	0.672445	0.582233	0.727664	0.0930541	0.0812932	0.0649849	0.0331184	0.0347236	0.121819	0.0298071
2.38003	2.24579	2.22748	2.14403	1.87792	1.54012	1.53653	1.64015	1.30918	0.9666	1.05369	1.08189	0.332881	0.776268	0.0988044	0.0341287	0.0966014	0.0354542	0.0561462	0.0258349	0.0543631
2.59827	2.5072	2.19083	2.36149	2.03457	1.8377	1.54013	1.61681	1.45501	1.5145	0.996987	1.06262	0.71123	0.293546	0.0391777	0.0661444	0.0559247	0.059057	0.0233062	0.0628965	0.0596411
2.58211	2.35582	2.16105	2.17931	1.95555	1.87567	1.91853	1.53031	1.40409	1.44691	0.49667	0.634158	0.878044	0.386026	0.101292	0.0821223	0.104158	0.0470267	0.0322023	0.0476992	0.0513902
3.94268	3.98356	4.08019	3.86861	3.78589	3.8625	3.72254	3.72948	3.72474	3.57151	3.46578	3.46692	3.15301	2.93406	0.715226	0.308548	0.600103	0.582602	0.324131	0.303771	0.0826783
3.6321	3.76461	3.692	3.74654	3.71082	3.59036	3.447	3.35083	3.46605	3.37915	3.21683	3.22959	2.87577	2.69208	0.230585	0.5433	0.361022	0.0865206	0.378353	0.187254	0.139827
3.18741	3.16105	3.23872	3.25869	3.05451	3.13849	2.89988	2.94885	3.04837	2.79759	2.71709	2.91109	2.49168	2.12599	0.565768	0.123241	0.124464	0.319545	0.0611958	0.219224	0.33348
3.33208	3.4256	3.48618	3.29827	3.32935	3.14881	3.22184	3.18633	3.01041	2.93651	2.88761	2.95766	2.72976	2.41759	0.252054	0.0370911	0.446679	0.238563	0.366821	0.120309	0.158021
3.61809	3.64428	3.60071	3.43786	3.4008	3.38067	3.37374	3.26989	3.20535	3.2172	3.07222	2.98898	2.80291	2.55851	0.276595	0.147473	0.452062	0.35717	0.232616	0.363367	0.156851
3.58286	3.30649	3.40232	3.31691	3.29021	3.20057	3.33852	3.13658	3.00518	2.7729	2.84783	2.76733	2.60549	2.46034	0.441228	0.542202	0.286019	0.218315	0.31427	0.465798	0.0561801
3.18	3.18117	3.18931	3.19079	2.92076	3.00116	2.93262	2.9292	2.96595	2.55635	2.57829	2.46452	2.37344	2.31674	0.244431	0.466138	0.455388	0.27666	0.186924	0.136923	0.389244
3.03855	3.07664	3.0003	2.96418	2.88306	2.89973	2.59479	2.83032	2.63751	2.64415	2.59492	2.41682	2.30778	2.23213	0.195834	0.314383	0.22827	0.250584	0.14703	0.0914167	0.150093
3.1474	3.15426	3.08548	3.01498	3.14241	2.94958	2.85058	2.86643	2.72518	2.73458	2.60682	2.64637	2.57065	2.3206	0.217904	0.309661	0.298635	0.181189	0.0608973	0.31985	0.0759948
2.74956	2.64354	2.86753	2.79533	2.72947	2.69578	2.36976	2.41528	2.25833	2.54846	2.26605	2.2036	2.1939	1.79895	0.222942	0.257556	0.247232	0.446518	0.233875	0.546737	0.337125
2.27826	2.21923	2.139	2.29954	2.1426	2.00258	2.00955	2.15591	2.00235	1.9273	1.6071	1.51156	1.43974	1.56011	0.34646	0.321762	0.329239	0.381916	0.216361	0.257587	0.179551
2.90976	2.97046	3.00878	2.97099	2.82868	2.57132	2.65102	2.6793	2.56681	2.47703	2.20282	2.43583	2.28679	1.45297	0.507647	0.435649	0.449019	0.283272	0.169886	0.207072	0.0680763
2.1131	2.30771	2.04875	2.04348	1.96894	2.02335	1.98634	2.06098	2.08235	1.76336	1.79853	1.66547	1.63806	0.845065	0.167459	0.2575	0.748465	0.0963085	0.0709992	0.338085	0.40012
1.94261	2.00131	1.59907	1.68698	1.67635	1.67093	1.67727	1.19918	1.55086	1.46933	0.729874	0.870685	0.331535	0.295657	0.143167	0.0458767	0.137239	0.279136	0.240135	0.279818	0.275207
2.42533	2.51706	2.42772	2.60965	2.3063	2.29071	2.15582	2.29458	2.35854	1.96396	2.07812	2.09898	1.63027	1.38446	0.389393	0.445105	0.565639	0.13046	0.0977738	0.209215	0.285632
2.01837	2.1571	1.99014	2.10575	1.96221	1.92753	1.99168	1.90822	1.75844	1.6098	1.41057	1.71508	1.31497	1.38965	0.118947	0.227226	0.305618	0.0604984	0.086881	0.258299	0.299802
2.25706	2.23552	1.93233	2.28906	2.1117	1.91598	1.85682	1.75647	1.69622	1.72578	1.99476	1.35906	1.61705	1.55167	0.0967826	0.0593432	0.152071	0.224176	0.327856	0.0901684	0.224153

## Sheet: figure2(a)
0.000110946	0.000124799	0.000142607	0.000166348	0.000199581	0.000249429	0.000332534	0.000498982	0.0010025	2.46993	2.5965	2.72007	2.84121	2.96034	3.07778	3.19377	3.30852	3.42218	3.53489	3.64675	3.75785
0.000110942	0.000124793	0.000142599	0.000166335	0.000199561	0.000249394	0.000332462	0.000498801	0.00100181	2.43358	2.56076	2.68496	2.80673	2.92648	3.04453	3.16113	3.27646	3.39069	3.50394	3.61634	3.72796
0.000102738	0.000114509	0.000129328	0.000148555	0.000174505	0.000211455	0.0002683	0.00036711	0.000582395	2.39946	2.52588	2.64925	2.77014	2.88901	3.00616	3.12185	3.2363	3.34965	3.46204	3.57359	3.68438
0.000102737	0.000114506	0.000129324	0.000148549	0.000174496	0.00021144	0.000268271	0.000367041	0.000582175	2.36878	2.49585	2.6198	2.74123	2.86059	2.9782	3.09433	3.20919	3.32293	3.4357	3.5476	3.65873
9.86282e-05	0.000109425	0.000122878	0.000140106	0.000162957	0.000194726	0.000241915	0.000319406	0.000470731	2.22718	2.35552	2.48077	2.60351	2.72416	2.84305	2.96043	3.07651	3.19144	3.30536	3.41839	3.53061
9.02978e-05	9.92657e-05	0.000110213	0.000123876	0.000141411	0.00016474	0.000197312	0.000246029	0.000327213	2.15958	2.28603	2.40945	2.53043	2.64938	2.76664	2.88244	2.99699	3.11046	3.22296	3.33462	3.44553
9.02967e-05	9.92643e-05	0.000110211	0.000123873	0.000141407	0.000164734	0.000197302	0.00024601	0.000327181	2.14539	2.2719	2.39541	2.51649	2.63556	2.75295	2.86889	2.98359	3.0972	3.20985	3.32166	3.43271
8.59639e-05	9.40526e-05	0.000103823	0.00011586	0.000131057	0.000150851	0.000177703	0.000216233	0.00027633	2.0348	2.16284	2.28755	2.40958	2.52941	2.6474	2.76383	2.87892	2.99284	3.10575	3.21775	3.32896
8.59639e-05	9.40526e-05	0.000103823	0.00011586	0.000131057	0.000150851	0.000177703	0.000216233	0.00027633	2.0348	2.16284	2.28755	2.40958	2.52941	2.6474	2.76383	2.87892	2.99284	3.10575	3.21775	3.32896
8.59538e-05	9.40398e-05	0.000103806	0.000115838	0.000131027	0.000150809	0.000177643	0.000216153	0.000276303	1.90533	2.03469	2.16097	2.28473	2.40637	2.52622	2.64452	2.76148	2.87726	2.992	3.1058	3.21876
8.14101e-05	8.86286e-05	9.72526e-05	0.000107737	0.000120759	0.000137366	0.000159283	0.000189557	0.000234207	1.90991	2.03742	2.16157	2.28303	2.40228	2.5197	2.63557	2.7501	2.86348	2.97585	3.08734	3.19804
8.14101e-05	8.86286e-05	9.72526e-05	0.000107737	0.000120759	0.000137366	0.000159283	0.000189557	0.000234207	1.90991	2.03742	2.16157	2.28303	2.40228	2.5197	2.63557	2.7501	2.86348	2.97585	3.08734	3.19804
8.14123e-05	8.86314e-05	9.72563e-05	0.000107742	0.000120766	0.000137376	0.000159297	0.000189578	0.000234234	1.93423	2.06117	2.18477	2.3057	2.42445	2.54137	2.65677	2.77085	2.8838	2.99575	3.10684	3.21716
8.14042e-05	8.86209e-05	9.72423e-05	0.000107723	0.000120738	0.000137335	0.00015923	0.000189459	0.000233973	1.68181	1.82234	1.95731	2.08802	2.21532	2.33985	2.46208	2.58236	2.70098	2.81816	2.93408	3.04889
8.14137e-05	8.86332e-05	9.72588e-05	0.000107746	0.000120771	0.000137384	0.000159311	0.000189605	0.000234307	1.96003	2.08544	2.20771	2.32748	2.44519	2.5612	2.67576	2.78908	2.90134	3.01266	3.12316	3.23293
8.14084e-05	8.86265e-05	9.725e-05	0.000107734	0.000120755	0.000137362	0.000159279	0.000189561	0.000234268	1.88781	2.01411	2.13735	2.25814	2.3769	2.49395	2.60957	2.72394	2.83722	2.94956	3.06105	3.1718
8.14081e-05	8.86261e-05	9.72495e-05	0.000107733	0.000120754	0.00013736	0.000159276	0.000189554	0.00023425	1.87345	2.00096	2.12524	2.24693	2.36648	2.48424	2.60048	2.71541	2.8292	2.942	3.05391	3.16504
8.14074e-05	8.8625e-05	9.72479e-05	0.000107731	0.00012075	0.000137353	0.000159262	0.000189523	0.000234154	1.81909	1.94706	2.0718	2.19395	2.31396	2.43219	2.54889	2.66429	2.77854	2.8918	3.00417	3.11576
7.64515e-05	8.27833e-05	9.02593e-05	9.92211e-05	0.000110161	0.000123816	0.000141345	0.000164682	0.000197349	1.74814	1.87294	1.99462	2.11382	2.23098	2.34646	2.46052	2.57336	2.68515	2.79603	2.9061	3.01547
7.64439e-05	8.27737e-05	9.0247e-05	9.92048e-05	0.000110139	0.000123786	0.000141302	0.000164618	0.000197278	1.58327	1.71087	1.83534	1.95731	2.07719	2.19533	2.31199	2.42736	2.54161	2.65487	2.76727	2.87888
7.6449e-05	8.27801e-05	9.02553e-05	9.92158e-05	0.000110154	0.000123807	0.000141332	0.000164662	0.000197325	1.71314	1.83864	1.961	2.08087	2.19869	2.3148	2.42947	2.54291	2.65528	2.76671	2.87733	2.98721
7.6449e-05	8.27801e-05	9.02553e-05	9.92158e-05	0.000110154	0.000123807	0.000141332	0.000164662	0.000197325	1.71314	1.83864	1.961	2.08087	2.19869	2.3148	2.42947	2.54291	2.65528	2.76671	2.87733	2.98721
7.64515e-05	8.27833e-05	9.02593e-05	9.92211e-05	0.000110161	0.000123816	0.000141345	0.000164682	0.000197349	1.74814	1.87294	1.99462	2.11382	2.23098	2.34646	2.46052	2.57336	2.68515	2.79603	2.9061	3.01547
7.64474e-05	8.27781e-05	9.02526e-05	9.92121e-05	0.000110148	0.000123798	0.000141318	0.000164636	0.000197259	1.67403	1.80178	1.9261	2.04768	2.16702	2.28451	2.40042	2.51498	2.62838	2.74076	2.85225	2.96295
7.64515e-05	8.27833e-05	9.02593e-05	9.92211e-05	0.000110161	0.000123816	0.000141345	0.000164682	0.000197349	1.74814	1.87294	1.99462	2.11382	2.23098	2.34646	2.46052	2.57336	2.68515	2.79603	2.9061	3.01547
7.64515e-05	8.27833e-05	9.02593e-05	9.92211e-05	0.000110161	0.000123816	0.000141345	0.000164682	0.000197349	1.74814	1.87294	1.99462	2.11382	2.23098	2.34646	2.46052	2.57336	2.68515	2.79603	2.9061	3.01547
7.64515e-05	8.27833e-05	9.02593e-05	9.92211e-05	0.000110161	0.000123816	0.000141345	0.000164682	0.000197349	1.74814	1.87294	1.99462	2.11382	2.23098	2.34646	2.46052	2.57336	2.68515	2.79603	2.9061	3.01547
7.64515e-05	8.27833e-05	9.02593e-05	9.92211e-05	0.000110161	0.000123816	0.000141345	0.000164682	0.000197349	1.74814	1.87294	1.99462	2.11382	2.23098	2.34646	2.46052	2.57336	2.68515	2.79603	2.9061	3.01547
7.6445e-05	8.27751e-05	9.02487e-05	9.9207e-05	0.000110141	0.000123789	0.000141304	0.000164613	0.00019721	1.62671	1.75374	1.87764	1.99902	2.11831	2.23587	2.35195	2.46675	2.58044	2.69317	2.80502	2.91612
7.64515e-05	8.27833e-05	9.02593e-05	9.92211e-05	0.000110161	0.000123816	0.000141345	0.000164682	0.000197349	1.74814	1.87294	1.99462	2.11382	2.23098	2.34646	2.46052	2.57336	2.68515	2.79603	2.9061	3.01547
7.64423e-05	8.27718e-05	9.02448e-05	9.92023e-05	0.000110136	0.000123783	0.000141301	0.000164625	0.000197308	1.62632	1.75291	1.87655	1.99779	2.11703	2.23459	2.3507	2.46557	2.57934	2.69216	2.80411	2.91531
7.64515e-05	8.27833e-05	9.02593e-05	9.92211e-05	0.000110161	0.000123816	0.000141345	0.000164682	0.000197349	1.74814	1.87294	1.99462	2.11382	2.23098	2.34646	2.46052	2.57336	2.68515	2.79603	2.9061	3.01547
7.06083e-05	7.59747e-05	8.22245e-05	8.95956e-05	9.84197e-05	0.000109174	0.000122573	0.000139734	0.000162528	1.36669	1.48988	1.61007	1.72788	1.84376	1.95804	2.07098	2.18277	2.29358	2.40353	2.51273	2.62127
7.06083e-05	7.59747e-05	8.22245e-05	8.95956e-05	9.84197e-05	0.000109174	0.000122573	0.000139734	0.000162528	1.36669	1.48988	1.61007	1.72788	1.84376	1.95804	2.07098	2.18277	2.29358	2.40353	2.51273	2.62127
7.06083e-05	7.59747e-05	8.22245e-05	8.95956e-05	9.84197e-05	0.000109174	0.000122573	0.000139734	0.000162528	1.36669	1.48988	1.61007	1.72788	1.84376	1.95804	2.07098	2.18277	2.29358	2.40353	2.51273	2.62127
7.0602e-05	7.59669e-05	8.22147e-05	8.9583e-05	9.84033e-05	0.000109153	0.000122544	0.000139694	0.000162482	1.26753	1.39295	1.51539	1.63544	1.7535	1.86991	1.98489	2.09866	2.21136	2.32314	2.43409	2.54431
7.06083e-05	7.59747e-05	8.22245e-05	8.95956e-05	9.84197e-05	0.000109174	0.000122573	0.000139734	0.000162528	1.36669	1.48988	1.61007	1.72788	1.84376	1.95804	2.07098	2.18277	2.29358	2.40353	2.51273	2.62127
7.06083e-05	7.59747e-05	8.22245e-05	8.95956e-05	9.84197e-05	0.000109174	0.000122573	0.000139734	0.000162528	1.36669	1.48988	1.61007	1.72788	1.84376	1.95804	2.07098	2.18277	2.29358	2.40353	2.51273	2.62127
7.06083e-05	7.59747e-05	8.22245e-05	8.95956e-05	9.84197e-05	0.000109174	0.000122573	0.000139734	0.000162528	1.36669	1.48988	1.61007	1.72788	1.84376	1.95804	2.07098	2.18277	2.29358	2.40353	2.51273	2.62127
7.05969e-05	7.59605e-05	8.22065e-05	8.95721e-05	9.83886e-05	0.000109132	0.000122513	0.000139645	0.000162392	1.11442	1.24557	1.37321	1.49799	1.62041	1.74084	1.85957	1.97683	2.09281	2.20766	2.32151	2.43447
7.06083e-05	7.59747e-05	8.22245e-05	8.95956e-05	9.84197e-05	0.000109174	0.000122573	0.000139734	0.000162528	1.36669	1.48988	1.61007	1.72788	1.84376	1.95804	2.07098	2.18277	2.29358	2.40353	2.51273	2.62127
7.06083e-05	7.59747e-05	8.22245e-05	8.95956e-05	9.84197e-05	0.000109174	0.000122573	0.000139734	0.000162528	1.36669	1.48988	1.61007	1.72788	1.84376	1.95804	2.07098	2.18277	2.29358	2.40353	2.51273	2.62127
7.0602e-05	7.59669e-05	8.22147e-05	8.9583e-05	9.84033e-05	0.000109153	0.000122544	0.000139694	0.000162482	1.26753	1.39295	1.51539	1.63544	1.7535	1.86991	1.98489	2.09866	2.21136	2.32314	2.43409	2.54431
7.06083e-05	7.59747e-05	8.22245e-05	8.95956e-05	9.84197e-05	0.000109174	0.000122573	0.000139734	0.000162528	1.36669	1.48988	1.61007	1.72788	1.84376	1.95804	2.07098	2.18277	2.29358	2.40353	2.51273	2.62127
7.06083e-05	7.59747e-05	8.22245e-05	8.95956e-05	9.84197e-05	0.000109174	0.000122573	0.000139734	0.000162528	1.36669	1.48988	1.61007	1.72788	1.84376	1.95804	2.07098	2.18277	2.29358	2.40353	2.51273	2.62127
7.06083e-05	7.59747e-05	8.22245e-05	8.95956e-05	9.84197e-05	0.000109174	0.000122573	0.000139734	0.000162528	1.36669	1.48988	1.61007	1.72788	1.84376	1.95804	2.07098	2.18277	2.29358	2.40353	2.51273	2.62127
7.06083e-05	7.59747e-05	8.22245e-05	8.95956e-05	9.84197e-05	0.000109174	0.000122573	0.000139734	0.000162528	1.36669	1.48988	1.61007	1.72788	1.84376	1.95804	2.07098	2.18277	2.29358	2.40353	2.51273	2.62127
7.06083e-05	7.59747e-05	8.22245e-05	8.95956e-05	9.84197e-05	0.000109174	0.000122573	0.000139734	0.000162528	1.36669	1.48988	1.61007	1.72788	1.84376	1.95804	2.07098	2.18277	2.29358	2.40353	2.51273	2.62127
7.0602e-05	7.59669e-05	8.22147e-05	8.9583e-05	9.84033e-05	0.000109153	0.000122544	0.000139694	0.000162482	1.26753	1.39295	1.51539	1.63544	1.7535	1.86991	1.98489	2.09866	2.21136	2.32314	2.43409	2.54431
7.05941e-05	7.59571e-05	8.22023e-05	8.9567e-05	9.83822e-05	0.000109124	0.000122505	0.000139641	0.000162431	0.997293	1.12793	1.25559	1.38077	1.50386	1.62516	1.7449	1.86328	1.98044	2.09653	2.21166	2.32591
7.05969e-05	7.59605e-05	8.22065e-05	8.95721e-05	9.83886e-05	0.000109132	0.000122513	0.000139645	0.000162392	1.11442	1.24557	1.37321	1.49799	1.62041	1.74084	1.85957	1.97683	2.09281	2.20766	2.32151	2.43447
7.05988e-05	7.5963e-05	8.22098e-05	8.95767e-05	9.8395e-05	0.000109141	0.000122528	0.000139673	0.000162458	1.19602	1.32266	1.44635	1.56764	1.68693	1.80455	1.92072	2.03565	2.14949	2.26237	2.37439	2.48566
7.05969e-05	7.59605e-05	8.22065e-05	8.95721e-05	9.83886e-05	0.000109132	0.000122513	0.000139645	0.000162392	1.11442	1.24557	1.37321	1.49799	1.62041	1.74084	1.85957	1.97683	2.09281	2.20766	2.32151	2.43447
7.06083e-05	7.59747e-05	8.22245e-05	8.95956e-05	9.84197e-05	0.000109174	0.000122573	0.000139734	0.000162528	1.36669	1.48988	1.61007	1.72788	1.84376	1.95804	2.07098	2.18277	2.29358	2.40353	2.51273	2.62127
7.05886e-05	7.59499e-05	8.21926e-05	8.95535e-05	9.83627e-05	0.000109094	0.000122454	0.000139544	0.00016218	0.28753	0.467775	0.636111	0.79555	0.948081	1.09509	1.23756	1.37625	1.51174	1.64447	1.7748	1.90304
7.06083e-05	7.59747e-05	8.22245e-05	8.95956e-05	9.84197e-05	0.000109174	0.000122573	0.000139734	0.000162528	1.36669	1.48988	1.61007	1.72788	1.84376	1.95804	2.07098	2.18277	2.29358	2.40353	2.51273	2.62127
7.06083e-05	7.59747e-05	8.22245e-05	8.95956e-05	9.84197e-05	0.000109174	0.000122573	0.000139734	0.000162528	1.36669	1.48988	1.61007	1.72788	1.84376	1.95804	2.07098	2.18277	2.29358	2.40353	2.51273	2.62127
7.06083e-05	7.59747e-05	8.22245e-05	8.95956e-05	9.84197e-05	0.000109174	0.000122573	0.000139734	0.000162528	1.36669	1.48988	1.61007	1.72788	1.84376	1.95804	2.07098	2.18277	2.29358	2.40353	2.51273	2.62127
7.0602e-05	7.59669e-05	8.22147e-05	8.9583e-05	9.84033e-05	0.000109153	0.000122544	0.000139694	0.000162482	1.26753	1.39295	1.51539	1.63544	1.7535	1.86991	1.98489	2.09866	2.21136	2.32314	2.43409	2.54431
7.06083e-05	7.59747e-05	8.22245e-05	8.95956e-05	9.84197e-05	0.000109174	0.000122573	0.000139734	0.000162528	1.36669	1.48988	1.61007	1.72788	1.84376	1.95804	2.07098	2.18277	2.29358	2.40353	2.51273	2.62127
7.06083e-05	7.59747e-05	8.22245e-05	8.95956e-05	9.84197e-05	0.000109174	0.000122573	0.000139734	0.000162528	1.36669	1.48988	1.61007	1.72788	1.84376	1.95804	2.07098	2.18277	2.29358	2.40353	2.51273	2.62127
0.300884	0.300933	0.30099	0.301061	0.30115	0.301265	0.301422	0.301658	0.302098	3.82339	3.89619	3.96058	4.01817	4.07015	4.1174	4.16064	4.2004	4.23715	4.27125	4.303	4.33266
0.300742	0.300781	0.300827	0.300885	0.300959	0.301059	0.301201	0.301427	0.301902	3.52501	3.59956	3.66649	3.72715	3.78255	3.83346	3.88049	3.92414	3.96481	4.00283	4.03848	4.07201
0.300572	0.300599	0.300632	0.300674	0.300731	0.300813	0.300939	0.301167	0.30175	2.92126	2.98942	3.05229	3.11069	3.16522	3.21638	3.26456	3.31008	3.3532	3.39415	3.43312	3.47029
0.300622	0.300654	0.300693	0.300743	0.300811	0.300906	0.301051	0.301306	0.30192	3.14086	3.20973	3.27285	3.33113	3.38525	3.43575	3.48308	3.52759	3.56957	3.60927	3.64691	3.68267
0.300671	0.300704	0.300745	0.300796	0.300863	0.300953	0.301085	0.301305	0.301798	3.32206	3.39655	3.46391	3.52536	3.58185	3.63406	3.68257	3.72783	3.77021	3.81002	3.84753	3.88294
0.300627	0.300655	0.30069	0.300733	0.300788	0.300863	0.300971	0.301145	0.301517	3.10198	3.18462	3.25936	3.32756	3.39023	3.44817	3.502	3.55221	3.59922	3.64338	3.68498	3.72426
0.300564	0.300589	0.30062	0.30066	0.300714	0.30079	0.300909	0.301124	0.301683	2.80565	2.88107	2.95041	3.01461	3.0744	3.13034	3.18289	3.23241	3.27922	3.32358	3.36571	3.40581
0.300536	0.300559	0.300589	0.300627	0.300679	0.300755	0.300875	0.301099	0.301707	2.67344	2.74216	2.80587	2.86531	2.92105	2.97354	3.02315	3.07018	3.11487	3.15744	3.19807	3.23692
0.300558	0.300581	0.30061	0.300646	0.300694	0.300758	0.300853	0.301006	0.301305	2.84457	2.91764	2.98483	3.04705	3.10502	3.15928	3.21029	3.25838	3.30388	3.34701	3.38801	3.42706
0.300499	0.300516	0.300538	0.300566	0.300603	0.300654	0.30073	0.300853	0.3011	2.44981	2.5201	2.58544	2.64655	2.70401	2.75824	2.80961	2.8584	2.90487	2.94922	2.99162	3.03224
0.300444	0.300458	0.300475	0.300499	0.300532	0.300582	0.300665	0.300831	0.301334	1.9533	2.00906	2.06173	2.11176	2.15948	2.20513	2.24895	2.29108	2.33169	2.37089	2.40878	2.44546
0.300527	0.300549	0.300576	0.300611	0.300658	0.300726	0.300834	0.301036	0.301596	2.61651	2.68771	2.75366	2.81516	2.8728	2.92706	2.97832	3.02688	3.07303	3.11697	3.15889	3.19896
0.300444	0.300458	0.300475	0.300499	0.300532	0.300582	0.300665	0.300831	0.301333	1.93693	1.99351	2.04694	2.09768	2.14606	2.19235	2.23674	2.27943	2.32055	2.36023	2.39858	2.43568
0.30044	0.300449	0.30046	0.300472	0.300488	0.300507	0.300532	0.300565	0.300613	1.38926	1.52326	1.64179	1.74841	1.84552	1.9348	2.0175	2.09458	2.16676	2.23465	2.29873	2.3594
0.300469	0.300484	0.300502	0.300527	0.300559	0.300606	0.30068	0.300819	0.301206	2.17781	2.24661	2.31088	2.37127	2.42831	2.48239	2.53382	2.58287	2.62976	2.67467	2.71777	2.75919
0.300431	0.300442	0.300456	0.300473	0.300496	0.300527	0.300575	0.300652	0.300803	1.84089	1.90124	1.95815	2.01209	2.06345	2.11251	2.15951	2.20465	2.24808	2.28994	2.33035	2.36942
0.300436	0.300447	0.300462	0.300481	0.300507	0.300544	0.300601	0.3007	0.300914	1.90736	1.96487	2.01912	2.07059	2.11962	2.16651	2.21146	2.25468	2.29629	2.33645	2.37524	2.41278

## Sheet: figure2(b)
3.75555	3.64479	3.5358	3.42166	3.30576	3.19774	3.07247	2.95293	2.84092	2.71525	2.59087	2.47753	2.33556	2.2012	2.04792	0.129853	0.0283558	0.0265327	0.066391	0.0383291	0.0323688
3.72944	3.61717	3.51025	3.39116	3.2787	3.16131	3.05292	2.92065	2.80038	2.68303	2.554	2.41766	2.29842	2.16008	2.01156	0.134014	0.0791237	0.0466646	0.0481754	0.0301745	0.0340076
3.68317	3.57293	3.43066	3.34857	3.2298	3.12198	3.01272	2.88265	2.77266	2.65026	2.51999	2.39696	2.26517	2.11649	1.97778	0.0655246	0.0394801	0.0680994	0.0344103	0.0258086	0.0434784
3.65539	3.53449	3.44729	3.31138	3.20309	3.08594	2.97972	2.86201	2.7458	2.62534	2.49121	2.3524	2.2396	2.09785	1.94465	0.0388491	0.0591813	0.0465948	0.0612202	0.044981	0.0353733
3.53216	3.42779	3.295	3.1877	3.07274	2.95476	2.83867	2.71769	2.59752	2.46881	2.34385	2.23777	2.09383	1.96031	1.81162	0.101257	0.0429065	0.0311581	0.0226475	0.02784	0.022845
3.44052	3.33535	3.21993	3.10576	2.99116	2.86994	2.76359	2.64763	2.53276	2.40226	2.28413	2.16089	2.04273	1.88978	1.75936	0.124264	0.0617847	0.0318004	0.039298	0.0373074	0.0381042
3.43702	3.31492	3.21456	3.09805	2.96811	2.8856	2.75278	2.62409	2.51082	2.39174	2.25655	2.13879	2.01028	1.86854	1.7207	0.148473	0.0441342	0.0439532	0.04542	0.0291669	0.0353743
3.32132	3.20345	3.09783	2.99383	2.87035	2.76121	2.64625	2.53787	2.42683	2.28799	2.15494	2.0531	1.92851	1.74747	1.63849	0.0516625	0.0620739	0.0436924	0.0285258	0.03721	0.0289438
3.33364	3.21556	3.10506	2.98955	2.87235	2.76975	2.66026	2.53695	2.41	2.31057	2.15974	2.0415	1.91691	1.77938	1.61249	0.0646641	0.0361579	0.0422287	0.0427066	0.0302561	0.0283705
3.22068	3.11569	2.98864	2.88437	2.76821	2.63673	2.53078	2.4071	2.27696	2.17525	2.0034	1.91704	1.77267	1.61578	1.48663	0.0604474	0.0365423	0.0338875	0.0408589	0.0383229	0.0263032
3.20349	3.08699	2.96614	2.8702	2.75411	2.63835	2.51111	2.39712	2.29024	2.16823	2.03685	1.91641	1.76633	1.63659	1.46854	0.0340576	0.0314898	0.0311203	0.0389156	0.0276585	0.0580863
3.20657	3.10137	2.97901	2.86117	2.74086	2.63218	2.53337	2.40255	2.28291	2.15563	2.03421	1.92998	1.79123	1.63304	1.46708	0.0726485	0.0288798	0.0298253	0.0251879	0.0454496	0.0311331
3.22717	3.10628	2.98918	2.88469	2.78032	2.64504	2.54369	2.40697	2.29837	2.17944	2.06711	1.93047	1.78493	1.64977	1.52347	0.0681994	0.041367	0.0395629	0.0397508	0.0386832	0.027085
3.06543	2.93556	2.80707	2.70498	2.58339	2.46563	2.34737	2.21752	2.05632	1.95775	1.81107	1.68425	1.54044	1.36463	1.24418	0.0785838	0.0256207	0.045714	0.0370567	0.0223447	0.0394656
3.22525	3.12805	3.00689	2.91226	2.78997	2.6502	2.54997	2.4336	2.32524	2.19752	2.08427	1.94482	1.83584	1.66159	1.52276	0.0557085	0.0471306	0.038898	0.0518191	0.0316513	0.0203903
3.17179	3.05853	2.94104	2.83649	2.72417	2.6109	2.49168	2.37795	2.2632	2.15544	2.01902	1.88517	1.75097	1.62859	1.49418	0.0789296	0.0632492	0.0363697	0.0460928	0.0458917	0.0320208
3.16511	3.05263	2.94732	2.83842	2.7068	2.60186	2.47933	2.36945	2.23138	2.12129	2.00005	1.87959	1.73521	1.6055	1.45951	0.113868	0.0707218	0.0463616	0.0426365	0.0361255	0.0441452
3.11914	3.00933	2.89517	2.7898	2.64886	2.5532	2.44244	2.3249	2.18059	2.07261	1.92145	1.80538	1.68555	1.55309	1.38118	0.0528193	0.0387172	0.0384253	0.0444895	0.0389945	0.026217
3.01028	2.90444	2.78893	2.69385	2.57192	2.46501	2.36302	2.24138	2.11445	2.01142	1.8686	1.74427	1.60333	1.49016	1.36842	0.0462638	0.0589622	0.0346609	0.0382622	0.0454262	0.0248222
2.8827	2.76145	2.67207	2.54418	2.42599	2.30036	2.19978	2.09021	1.96331	1.82051	1.69445	1.56757	1.47423	1.31308	1.13939	0.0631433	0.023484	0.0509246	0.0336816	0.0318335	0.0270948
2.98519	2.86682	2.75994	2.64918	2.52193	2.42753	2.30091	2.18934	2.08965	1.94894	1.83475	1.70791	1.57653	1.4323	1.32136	0.0446125	0.0264343	0.0317073	0.0311722	0.0410557	0.0284648
2.99085	2.87659	2.76963	2.65803	2.52612	2.43636	2.31037	2.19686	2.06055	1.95603	1.83862	1.7155	1.59026	1.4108	1.30459	0.0512981	0.0467084	0.0283338	0.0387626	0.0420808	0.0197136
3.0163	2.90512	2.78285	2.6755	2.58043	2.45154	2.34809	2.23635	2.13292	2.0008	1.87588	1.7154	1.60607	1.49499	1.34911	0.0536742	0.0459839	0.0381648	0.0411264	0.0407722	0.0280005
2.96794	2.83006	2.73104	2.62221	2.52202	2.39492	2.28675	2.17502	2.0606	1.93397	1.78236	1.67374	1.52638	1.39685	1.2601	0.0445263	0.0372467	0.0343261	0.0233019	0.0320912	0.0312599
3.01426	2.90891	2.79496	2.67908	2.58014	2.45555	2.33153	2.23937	2.11364	1.98987	1.86332	1.75169	1.60613	1.47117	1.31694	0.0979917	0.0430692	0.0226029	0.0439505	0.0268455	0.033015
3.02546	2.89334	2.78992	2.67018	2.56856	2.46872	2.35465	2.23756	2.12045	1.96531	1.87235	1.7248	1.62003	1.47467	1.34672	0.0490365	0.0386986	0.038578	0.0232979	0.0360855	0.0324685
3.00568	2.90055	2.79311	2.67336	2.5702	2.46093	2.34735	2.23014	2.09735	1.98364	1.85654	1.73575	1.6204	1.49079	1.34294	0.0651594	0.0504303	0.0397478	0.0323629	0.0514788	0.022164
3.01634	2.91051	2.79804	2.67277	2.5739	2.46224	2.33432	2.24742	2.09927	1.97921	1.87459	1.73347	1.60553	1.50507	1.31444	0.0426023	0.0620881	0.0407996	0.0394566	0.0405505	0.0412635
2.92001	2.81276	2.69641	2.5724	2.45004	2.36053	2.24481	2.10778	1.98213	1.86564	1.73685	1.62757	1.49014	1.37643	1.23264	0.0795299	0.0615797	0.0592226	0.0231565	0.0382045	0.0235945
3.01314	2.90813	2.7996	2.68286	2.56247	2.47794	2.34765	2.232	2.11695	2.00139	1.85806	1.72897	1.60707	1.49105	1.38336	0.055811	0.0456314	0.0363844	0.0442259	0.0369288	0.0280861
2.91683	2.79954	2.6937	2.5662	2.45456	2.35227	2.22292	2.10951	2.01281	1.87345	1.73672	1.63463	1.47645	1.36059	1.17372	0.0480389	0.0428334	0.0285569	0.056676	0.0452469	0.027218
3.01688	2.91486	2.79567	2.69976	2.57466	2.43887	2.3388	2.22784	2.12229	2.00066	1.88312	1.7286	1.61288	1.48699	1.32837	0.0410532	0.0576549	0.028707	0.0282777	0.0308511	0.0314671
2.61817	2.50049	2.38828	2.27478	2.19249	2.06843	1.96833	1.85049	1.74101	1.61253	1.49963	1.3596	1.20586	1.09848	0.960898	0.0823728	0.061189	0.0418255	0.0364714	0.0231242	0.0230804
2.62247	2.50656	2.39834	2.29177	2.18805	2.07482	1.95246	1.84889	1.73778	1.60127	1.46554	1.38256	1.2075	1.10437	0.997532	0.0742092	0.0509261	0.0220657	0.0324181	0.0493138	0.0320452
2.62465	2.53452	2.40628	2.28986	2.19523	2.07597	1.93971	1.82863	1.72826	1.60778	1.48826	1.37429	1.21749	1.10858	0.938351	0.0348091	0.0356841	0.0206486	0.0323693	0.0170127	0.0262652
2.54328	2.42285	2.32094	2.21228	2.09466	1.97773	1.86986	1.78377	1.63243	1.52498	1.38126	1.28094	1.12712	1.0061	0.862566	0.0525192	0.0152589	0.0393884	0.0418002	0.019744	0.0142697
2.61559	2.51488	2.39621	2.29208	2.18322	2.09233	1.96249	1.83841	1.71078	1.62674	1.46467	1.3655	1.23613	1.10811	0.914751	0.0475747	0.0492291	0.0181131	0.0305404	0.0250968	0.0333746
2.60915	2.51124	2.40767	2.29249	2.16857	2.05946	1.95209	1.84322	1.73652	1.59384	1.4913	1.36727	1.26286	1.10193	0.98452	0.0654595	0.0221277	0.0279136	0.0221799	0.0431096	0.0270514
2.62148	2.5185	2.41405	2.29341	2.17103	2.06494	1.95856	1.82472	1.73606	1.61338	1.46795	1.34628	1.2302	1.08602	0.983069	0.0415046	0.0246921	0.0314663	0.0288376	0.0335724	0.0257824
2.45104	2.3153	2.21165	2.09881	1.97389	1.85502	1.73072	1.6466	1.50664	1.36577	1.24312	1.09152	0.975858	0.831988	0.596017	0.0567597	0.0567272	0.0174165	0.0329893	0.0320849	0.0212766
2.63838	2.51884	2.3933	2.27567	2.18302	2.06856	1.95278	1.83486	1.74233	1.61105	1.49815	1.36583	1.21732	1.12885	0.933387	0.0454908	0.0319387	0.0319697	0.0323755	0.032757	0.0493112
2.62348	2.50339	2.41054	2.2939	2.17679	2.05853	1.94952	1.83089	1.75133	1.60752	1.47634	1.37432	1.22464	1.09933	0.903977	0.0503075	0.0368928	0.0324941	0.0317297	0.0324022	0.0387184
2.54791	2.44407	2.32278	2.21805	2.09305	1.98233	1.86953	1.73232	1.64072	1.53129	1.37829	1.23413	1.13532	1.01472	0.872057	0.0486403	0.041366	0.0388276	0.0395769	0.0385283	0.0201165
2.63497	2.50497	2.40472	2.29566	2.18852	2.03322	1.97169	1.85081	1.72589	1.59734	1.48917	1.34529	1.2265	1.11285	0.964451	0.0626781	0.0259409	0.0474214	0.0387396	0.0222913	0.0284147
2.60495	2.51503	2.39154	2.29145	2.17713	2.07434	1.98199	1.82887	1.73199	1.59514	1.49914	1.34369	1.2232	1.13091	0.911345	0.0438437	0.04262	0.0341575	0.0410171	0.0198639	0.0246163
2.60938	2.50707	2.40187	2.28368	2.18472	2.06843	1.95589	1.82418	1.71558	1.61632	1.49227	1.34493	1.19916	1.10074	0.946836	0.077468	0.0330619	0.0448995	0.0482838	0.048067	0.0238252
2.6081	2.52079	2.40231	2.28256	2.18856	2.05968	1.96873	1.8711	1.73405	1.60528	1.49729	1.35418	1.25096	1.11496	0.941708	0.0348082	0.0468534	0.0254004	0.0280439	0.0438079	0.0284963
2.6409	2.51117	2.41249	2.29611	2.1687	2.07142	1.9645	1.8248	1.73369	1.58324	1.49726	1.38307	1.26036	1.10491	0.949481	0.054092	0.0350535	0.0430504	0.0378266	0.0305858	0.0240687
2.54601	2.43606	2.31094	2.20537	2.08922	1.96308	1.87696	1.75454	1.63814	1.52892	1.39889	1.25435	1.13992	0.981329	0.884332	0.0558192	0.0388847	0.0124338	0.0380819	0.0296831	0.0303728
2.3356	2.21794	2.08173	1.96973	1.8704	1.72375	1.62997	1.48443	1.35795	1.24743	1.12359	1.02223	0.833157	0.720194	0.590865	0.0401553	0.0474876	0.0333051	0.0289934	0.0283577	0.0315457
2.43237	2.32326	2.21066	2.09697	1.97403	1.86336	1.7358	1.63726	1.49739	1.37474	1.21357	1.1352	0.961742	0.826549	0.678769	0.0352324	0.0577983	0.0279041	0.0373501	0.021506	0.0380085
2.49562	2.36795	2.27817	2.16377	2.02729	1.9215	1.7907	1.69136	1.58495	1.4442	1.32202	1.20064	1.07891	0.911945	0.764734	0.0450998	0.0262816	0.0386898	0.0251519	0.0268324	0.0360818
2.42872	2.31884	2.20582	2.08504	1.97363	1.86774	1.72552	1.60624	1.52147	1.38834	1.23343	1.12242	0.973743	0.835504	0.643522	0.0433384	0.0578653	0.0343318	0.0440246	0.0364239	0.0235694
2.61243	2.51952	2.39934	2.28113	2.18265	2.07092	1.97193	1.85101	1.71912	1.58806	1.48536	1.37454	1.22793	1.10957	1.00656	0.0481783	0.0233781	0.0225496	0.0229163	0.0252926	0.0319236
1.91643	1.80201	1.64478	1.5028	1.36859	1.2565	1.11265	0.967505	0.745868	0.55108	0.121471	0.304795	0.124734	0.0824853	0.0547372	0.0328142	0.0568363	0.0352528	0.0275891	0.0377406	0.0285337
2.62008	2.51093	2.41815	2.29185	2.18442	2.04939	1.95497	1.83138	1.70353	1.56918	1.46771	1.36712	1.23504	1.10945	0.945112	0.0401168	0.0315103	0.0466578	0.0312326	0.0195822	0.0446094
2.63148	2.50024	2.40134	2.28016	2.17742	2.07272	1.93098	1.84675	1.70692	1.62066	1.49119	1.35646	1.23245	1.12885	0.922551	0.045628	0.0357086	0.0274384	0.0423672	0.0259533	0.0435995
2.62026	2.51213	2.39813	2.31004	2.16173	2.06519	1.96031	1.85081	1.7292	1.56214	1.45245	1.39141	1.25313	1.05724	0.936042	0.0441891	0.0580853	0.0335865	0.028984	0.02943	0.0398911
2.54862	2.42186	2.32646	2.21836	2.11335	1.97863	1.88171	1.73174	1.62203	1.51639	1.3993	1.2887	1.12873	0.971477	0.888414	0.045922	0.0632449	0.0407713	0.0297824	0.047258	0.0351453
2.62665	2.51793	2.4115	2.2841	2.19549	2.05767	1.97183	1.83112	1.74683	1.58469	1.48194	1.38029	1.23382	1.08042	0.918111	0.053513	0.0367957	0.0351873	0.0246767	0.0352305	0.0375353
2.622	2.50416	2.39585	2.29598	2.18204	2.07131	1.96857	1.82782	1.71207	1.60845	1.48889	1.39155	1.26685	1.11174	0.960386	0.0496196	0.0524558	0.036195	0.0323889	0.0332873	0.033583
4.32679	4.30023	4.26569	4.23183	4.19805	4.16068	4.11939	4.06417	4.01098	3.95749	3.88549	3.82238	3.73463	3.63709	3.50394	0.665166	0.515852	0.239528	0.438709	0.404237	0.45724
4.07382	4.03763	3.99863	3.96447	3.92153	3.87242	3.83336	3.78349	3.72147	3.66795	3.58713	3.50461	3.43507	3.342	3.2255	0.50116	0.538118	0.236264	0.462116	0.433858	0.228752
3.47275	3.43505	3.39956	3.34465	3.30921	3.25795	3.21443	3.15394	3.12194	3.0557	2.9875	2.92058	2.83582	2.75784	2.66261	0.530688	0.34847	0.371183	0.445164	0.321528	0.322809
3.67703	3.64746	3.61315	3.57434	3.52166	3.48026	3.42069	3.38457	3.33317	3.25621	3.19324	3.13962	3.06577	2.9889	2.87134	0.525768	0.290641	0.34419	0.333727	0.208302	0.283628
3.88627	3.85211	3.80713	3.76806	3.71768	3.67919	3.6321	3.57507	3.52943	3.45999	3.39365	3.31827	3.2406	3.13474	3.03004	0.568242	0.414555	0.236005	0.345757	0.364932	0.377663
3.72136	3.6866	3.64356	3.60629	3.53964	3.50397	3.44789	3.39321	3.33232	3.26457	3.19213	3.1025	3.00341	2.89261	2.74617	0.353887	0.386935	0.18148	0.432704	0.369931	0.425107
3.40098	3.36508	3.32907	3.27668	3.24199	3.17308	3.11503	3.0799	3.00322	2.95583	2.8787	2.82235	2.73231	2.62344	2.52223	0.487332	0.420937	0.36674	0.230453	0.353734	0.295766
3.24171	3.20122	3.16349	3.11155	3.07005	3.016	2.97093	2.93323	2.85907	2.78728	2.73559	2.67066	2.59829	2.52069	2.43019	0.477331	0.190154	0.302946	0.279451	0.248323	0.337437
3.43206	3.38987	3.34054	3.29783	3.26158	3.2124	3.1598	3.10469	3.05053	2.98251	2.91598	2.85176	2.76333	2.67441	2.5808	0.381325	0.293471	0.247319	0.382181	0.137038	0.175673
3.03024	2.98985	2.93224	2.90701	2.86899	2.81391	2.75929	2.70796	2.63862	2.58935	2.50446	2.45856	2.37493	2.28679	2.19774	0.418956	0.215743	0.274979	0.294588	0.310763	0.364887
2.42223	2.4114	2.35278	2.33443	2.27631	2.24786	2.20618	2.14753	2.11674	2.06597	1.99851	1.95102	1.88117	1.84417	1.76972	0.30444	0.078551	0.274484	0.349308	0.303565	0.275842
3.20502	3.16388	3.13194	3.06433	3.02423	2.9904	2.92548	2.86026	2.79762	2.75306	2.66764	2.60742	2.55778	2.44859	2.34556	0.415182	0.366722	0.259401	0.307439	0.329796	0.358192
2.43726	2.38853	2.36427	2.3209	2.28162	2.23023	2.1848	2.14131	2.08998	2.05166	1.99398	1.92884	1.87722	1.81335	1.72449	0.463313	0.32852	0.148265	0.337151	0.323523	0.352169
2.38242	2.30204	2.23479	2.16721	2.10204	2.00831	1.94065	1.83575	1.70847	1.60055	1.36537	1.3964	1.24831	1.12734	1.10725	0.355498	0.308341	0.203008	0.317137	0.15681	0.381699
2.7633	2.71538	2.6805	2.62263	2.56019	2.5412	2.48575	2.41664	2.37527	2.31106	2.24592	2.18561	2.10393	2.01511	1.94806	0.263801	0.403535	0.309922	0.259884	0.290954	0.406873
2.36839	2.33784	2.26706	2.22632	2.20221	2.14384	2.11139	2.04782	2.00502	1.9361	1.86691	1.83698	1.77257	1.7008	1.62048	0.394519	0.286196	0.371997	0.10276	0.317063	0.234227
2.41237	2.36394	2.34732	2.28113	2.25926	2.19809	2.17234	2.09292	2.07862	2.02912	1.95604	1.90798	1.83491	1.76218	1.70742	0.355834	0.381423	0.138092	0.183439	0.157647	0.351357

## Sheet: figure2(c)
3.69363	3.53842	3.40164	3.33817	3.13559	0.0566265	0.00212344	0.00153938	0.0278386	0.0177645	0.00546942	0.0217547	0.00654597	0.007022	0.00033033	0.00193659	0.0045514	0.00367911	0.00702386	0.00183216	0.0040518
3.68294	3.49747	3.47304	3.27045	3.05041	0.0670541	0.0278834	0.0250696	0.00298415	0.00424005	0.00324781	0.00235668	0.00774087	0.00565376	0.000384242	0.0208929	0.0497426	0.000851503	0.0108606	0.00755669	0.0017941
3.65695	3.41173	3.30624	3.22683	2.97383	0.000828382	0.00761138	0.0189022	0.00692858	0.00905315	0.0100521	0.0203299	0.0190964	0.00287144	0.00211066	0.0389042	0.00145638	0.00292757	0.0089731	0.00103383	0.00129077
3.55583	3.46192	3.36615	3.22319	2.97967	0.155535	0.00868348	0.00995027	0.00260551	0.0028718	0.00893758	0.00104758	0.00324344	0.0133565	0.00282515	0.00670407	0.00229809	0.00329527	0.000665268	0.00156127	0.00184997
3.39311	3.28878	3.18386	2.97065	2.91783	0.0117777	0.0478143	0.00322234	0.0120339	0.00463656	0.00424568	0.00309865	0.00121914	0.00124039	0.0025631	0.00669878	0.000837091	0.000922157	0.0106551	0.00150342	0.00189468
3.33458	3.20061	3.15226	2.95391	2.81866	0.00292313	0.00441463	0.00477477	0.0108693	0.0129192	0.0147147	0.00670084	0.0307498	0.00529305	0.000528921	0.00198149	0.00524068	0.00315647	0.000304024	0.0022931	0.00293683
3.35089	3.27059	3.08099	2.98522	2.78812	0.00597793	0.0061592	0.00654101	0.0114892	0.000996664	0.0077481	0.00434841	0.0458741	0.0189011	0.0132048	0.00385099	0.00235238	0.000515442	0.00173797	0.00274488	0.00848288
3.25168	3.12798	3.00329	2.90087	2.72264	0.0219817	0.00196149	0.00774431	0.000938184	0.0163564	0.0564319	0.0047942	0.00759304	0.00338948	0.00543711	0.0142654	0.00155679	0.00401628	0.00384105	0.00217368	0.00285412
3.31315	3.03978	2.95493	2.78928	2.74148	0.0626596	0.0358292	0.00314641	0.020253	0.0146062	0.00429922	0.0100904	0.000507306	0.00448397	0.0119466	0.000759808	0.00250742	0.00581719	0.00918676	0.00677706	0.00431811
3.13633	3.05665	2.88235	2.76862	2.60268	0.00398984	0.0158343	0.0064265	0.00188718	0.0017647	0.00122747	0.00213739	0.00207283	0.00571321	0.00802991	0.0130342	0.00559208	0.0082348	0.00719898	0.0032019	0.00087662
3.06903	3.11838	2.82694	2.72361	2.56906	0.00590807	0.00243681	0.0354286	0.00658777	0.0208448	0.0152166	0.00833353	0.00844045	0.020437	0.00222109	0.0145087	0.00244607	0.000827149	0.000922318	0.000518298	0.00476573
3.08284	3.03562	2.84325	2.71791	2.60789	0.127503	0.0156785	0.0256414	0.00306915	0.0132106	0.00940729	0.00216999	0.0102011	0.00185891	0.00195834	0.0204542	0.00745679	0.00370829	0.0026498	0.00383953	0.00292124
3.13139	3.12522	2.91749	2.89386	2.61436	0.00836271	0.00760037	0.00488083	0.0415771	0.00300258	0.00626024	0.00632141	0.016537	0.0037678	0.00445169	0.0272162	0.00106645	0.00844364	0.00233787	0.00825995	0.000613773
3.02036	2.6923	2.8199	2.53905	2.43029	0.0493275	0.0141467	0.00340957	0.0152068	0.00617728	0.0318163	0.00461525	0.00825938	0.00608015	0.0157525	0.00191137	0.00502465	0.00184414	0.0150367	0.000490207	0.0108862
3.11014	2.83939	3.07297	2.71812	2.77	0.0405686	0.016176	0.00775786	0.00213524	0.00207269	0.00550927	0.00167789	0.00136237	0.00411974	0.00182114	0.00933247	0.00357606	0.00156418	0.00352485	0.00593033	0.00182577
2.86778	2.97865	2.74033	2.7813	2.51082	0.0676206	0.00147155	0.005151	0.0372687	0.00907729	0.00839312	0.00343612	0.0144035	0.00966776	0.00171096	0.00310661	0.00239586	0.00338797	0.000994377	0.00438225	0.00109239
3.17451	2.88661	2.75984	2.71004	2.51151	0.00982971	0.0478436	0.0596517	0.0436727	0.0255155	0.000870994	0.0164722	0.0115571	0.0155004	0.00438628	0.00525374	0.0032842	0.00680546	0.000482731	0.00460462	0.00322262
3.09743	2.97043	2.74612	2.81014	2.5599	0.00402899	0.0015185	0.00164282	0.033818	0.00159652	0.0150908	0.0278641	0.00757559	0.00455339	0.00189922	0.00662635	0.0173245	0.000891264	0.00549719	0.00189236	0.00120979
2.87712	2.78471	2.81846	2.42539	2.53478	0.0154691	0.016578	0.0277874	0.00512639	0.00209151	0.00572092	0.00320189	0.0127372	0.00647796	0.00638841	0.00385629	0.00151564	0.000273171	0.000834193	0.00705722	0.00896082
2.7711	2.5883	2.61044	2.5091	2.20771	0.0040033	0.00437608	0.00459576	0.00304362	0.00610125	0.00341208	0.00334471	0.00613963	0.0205545	0.00948633	0.00829361	0.00244752	0.00718697	0.00166174	0.00657299	0.00515184
2.81849	2.63445	2.64137	2.41326	2.49108	0.00182638	0.00328812	0.00633898	0.002758	0.00130368	0.00467351	0.00681816	0.0180478	0.00108867	0.013743	0.00731814	0.00123083	0.00593336	0.00356266	0.00226227	0.00164552
2.90421	2.72324	2.73011	2.60611	2.44899	0.0511045	0.00906465	0.0296065	0.00557458	0.00252612	0.00915991	0.00205491	0.0127215	0.00124409	0.00147051	0.000912324	0.00467329	0.00900521	0.00121012	0.0028412	0.000993156
2.82879	2.75035	2.64662	2.60359	2.39927	0.0261699	0.00958193	0.00516488	0.0722513	0.0199241	0.00565547	0.00466937	0.00433406	0.00133479	0.00780002	0.00507574	0.0019155	0.00528824	0.0011553	0.00327335	0.000516713
2.90116	2.65856	2.66978	2.40301	2.27973	0.0418121	0.00148437	0.0101381	0.013793	0.00280902	0.00316481	0.00206514	0.0102494	0.000413	0.0129535	0.0108151	0.00269702	0.00612197	0.00689416	0.00194905	0.00236877
2.83404	2.91684	2.69508	2.68742	2.51956	0.0160386	0.011226	0.00151339	0.00675933	0.00537244	0.00598597	0.00409925	0.0026217	0.027128	0.00538875	0.0019251	0.00261281	0.000946547	0.00760866	0.00462687	0.00135011
2.86586	2.85443	2.84996	2.49182	2.41595	0.0155115	0.00521188	0.00129502	0.015275	0.00721915	0.0690568	0.00547172	0.0189963	0.00207333	0.00156134	0.00119483	0.0117313	0.0288137	0.00597159	0.00171481	0.0016322
2.89186	2.68293	2.75441	2.61136	2.41409	0.0054826	0.00310573	0.00032136	0.0397808	0.00267455	0.00816515	0.00318567	0.00205529	0.00061049	0.0103046	0.00269568	0.00203252	0.00276557	0.00539988	0.00866471	0.00862877
2.8974	2.78341	2.75398	2.5256	2.37493	0.00370079	0.0338092	0.0118067	0.00354196	0.00821768	0.00240906	0.00189874	0.00176074	0.00970591	0.000386237	0.00247299	0.00198467	0.00310044	0.00228712	0.00179951	0.00254437
2.83029	2.65047	2.59282	2.48166	2.38998	0.0125389	0.00131785	0.0239424	0.00247951	0.0054412	0.000543032	0.00562658	0.0097186	0.00198525	0.00617295	0.00113487	0.0014308	0.00541112	0.00232268	0.00430973	0.000485915
3.03495	2.82634	2.81905	2.58664	2.43676	0.00756272	0.00734174	0.00591796	0.00680392	0.00332676	0.00987641	0.00547919	0.0118543	0.00161501	0.00650991	0.0157373	0.00122998	0.000961105	0.00918582	0.00264485	0.00564887
2.81351	2.58101	2.50353	2.45374	2.36943	0.00205604	0.0190148	0.0169993	0.00391556	0.0153688	0.0156489	0.012949	0.00163892	0.0290646	0.0151738	0.00730438	0.0188376	0.0164642	0.00207602	0.00439277	0.00188091
2.83811	2.68242	2.81621	2.49216	2.36861	0.0702039	0.0108712	0.0201582	0.0704001	0.00640817	0.0163831	0.0017391	0.0259004	0.0196071	0.00248653	0.00176757	0.00295919	0.000888148	0.00310169	0.000929844	0.00200243
2.50787	2.37579	2.20454	2.23456	2.06908	0.0130987	0.00449375	0.00733927	0.00426231	0.00138866	0.00584232	0.00284286	0.00450241	0.0157424	0.00675883	0.00531404	0.00489968	0.00371967	0.00247538	0.00562518	0.00191953
2.48737	2.38891	2.32461	2.18052	1.99799	0.00862014	0.00369165	0.019164	0.00159125	0.000951103	0.00482238	0.000437605	0.00409952	0.00353204	0.0881273	0.00154918	0.00298337	0.00325489	0.00421755	0.00279386	0.000489974
2.57981	2.54204	2.34824	2.16523	2.17113	0.00172877	0.0365422	0.00126037	0.00964192	0.0050846	0.00758379	0.0013308	0.00377006	0.00327889	0.00202684	0.00269448	0.00873837	0.00454769	0.00679558	0.000355623	0.0015186
2.16882	2.40432	2.20257	2.14673	2.12533	0.00628161	0.00387621	0.000894642	0.00411004	0.00421956	0.00198267	0.00823791	0.00180517	0.00798311	0.00254497	0.000575776	0.00331605	0.000927507	0.00631493	0.000662716	0.00296693
2.43671	2.35649	2.34842	1.98153	2.02973	0.00861053	0.0571526	0.00639968	0.00358714	0.0983571	0.00951921	0.00240468	0.00161298	0.00196934	0.0002894	0.00261024	0.0043195	0.00658431	0.00124381	0.00233098	0.00177889
2.5738	2.53978	2.26456	2.24598	1.92499	0.00327195	0.0256797	0.0107941	0.01202	0.00353371	0.0146011	0.00680185	0.0114564	0.00361507	0.00178402	0.00223157	0.00465433	0.00381311	0.00134847	0.0100162	0.0240653
2.51484	2.42365	2.42899	2.16842	2.01645	0.00493364	0.00093282	0.0222297	0.00695507	0.00254728	0.00144823	0.00689045	0.00751437	0.00288335	0.00196698	0.000540795	0.00185054	0.0219223	0.00130029	0.000497568	0.0111545
2.26686	2.31234	2.03038	1.76061	1.87187	0.131493	0.00441759	0.00490935	0.00187497	0.00351756	0.00465722	0.00197897	0.00475181	0.00359633	0.00121873	0.000887229	0.00377181	0.00102355	0.00711336	0.00347365	0.0126012
2.58922	2.39631	2.41848	2.35097	2.06167	0.00224165	0.00401654	0.0060023	0.0021069	0.0145419	0.00544298	0.00567859	0.00360235	0.00650574	0.00270741	0.00901341	0.0063482	0.000932775	0.0157677	0.00219833	0.00129294
2.53466	2.50007	2.36128	2.17644	2.06091	0.0121154	0.00215486	0.0033845	0.0224047	0.00670911	0.00397426	0.0170411	0.000404847	0.004606	0.00211224	0.000786065	0.000721864	0.00479778	0.0022752	0.00237054	0.00404466
2.48467	2.33886	2.26256	2.11272	1.87193	0.0297633	0.0360712	0.0224681	0.0146117	0.000930122	0.00421478	0.00326977	0.00209942	0.00408204	0.00865689	0.0028667	0.00444716	0.0100976	0.0013909	0.00508463	0.00132361
2.60266	2.34774	2.32356	2.20681	2.08943	0.0324399	0.0114554	0.0557136	0.00302097	0.00369637	0.000507132	0.0138946	0.00529611	0.00234816	0.00180031	0.00321296	0.00130126	0.00554309	0.00176338	0.00356548	0.00124817
2.5772	2.38849	2.18807	2.10174	2.01079	0.153646	0.0337127	0.0202988	0.00296352	0.024629	0.0191279	0.0119391	0.00555457	0.00261982	0.0110452	0.00440497	0.000398488	0.00244245	0.0022285	0.00287265	0.000643773
2.63937	2.32468	2.15102	2.3844	2.07752	0.00167457	0.0112185	0.00083613	0.0297725	0.0907478	0.0188099	0.0102081	0.0130279	0.000947075	0.00323439	0.0023894	0.0004992	0.00315431	0.00555831	0.0176723	0.00188574
2.68973	2.41034	2.36436	2.11707	1.98635	0.0499367	0.0176076	0.0152047	0.00530639	0.00886019	0.0138899	0.0020045	0.00610449	0.00424501	0.00315436	0.000467078	0.00482431	0.00602775	0.00486807	0.00494822	0.000377941
2.47834	2.42516	2.18678	2.1824	2.00609	0.0530831	0.00497394	0.00349189	0.00107227	0.00824519	0.0706743	0.00180363	0.00147895	0.00284652	0.00764438	0.00284822	0.00357576	0.000593407	0.00365558	0.0127566	0.0020016
2.41563	2.26587	2.2435	2.01685	2.00891	0.00989541	0.0396743	0.0580361	0.00384202	0.0134765	0.00380897	0.00529139	0.000844364	0.00168586	0.0126108	0.00332746	0.00550516	0.0275583	0.00149282	0.000672282	0.0129659
2.13555	2.10335	2.02155	1.73907	1.73073	0.0213695	0.00287146	0.00240557	0.00748605	0.00493212	0.000937057	0.00238983	0.00212601	0.0154119	0.00340018	0.00276578	0.00266645	0.0108321	0.00216201	0.00214706	0.00645433
2.38708	2.23829	2.12744	1.9954	1.82966	0.171566	0.0140909	0.0185611	0.0200975	0.000472416	0.00366906	0.0192831	0.020887	0.00750575	0.00846683	0.00171472	0.00065281	0.00259901	0.00774186	0.000888454	0.00417222
2.37095	2.27036	2.03072	2.02263	1.90149	0.00303114	0.062086	0.00412012	0.00185585	0.0176231	0.0112595	0.00253396	0.004732	0.00729288	0.00354308	0.00168521	0.0103481	0.00132676	0.00134198	0.00388282	0.000209799
2.31582	2.11761	1.99473	1.95182	1.81622	0.0524237	0.00938536	0.0251943	0.0172025	0.0170567	0.00165586	0.00766979	0.00966341	0.00355636	0.00373096	0.00100577	0.00466162	0.00421632	0.00532383	0.00288509	0.00295148
2.4559	2.26256	2.43399	2.24791	1.98758	0.00116713	0.0207015	0.069198	0.00342475	0.00534051	0.00342351	0.0363843	0.00967752	0.0118685	0.000927539	0.00426215	0.00227496	0.00338232	0.00204902	0.00106105	0.0148937
1.84639	1.49164	1.23584	1.09663	1.10601	0.00109296	0.00684092	0.0207076	0.00991269	0.00840964	0.00200361	0.0141624	0.00352923	0.000910721	0.00393346	0.00201557	0.00225703	0.00153864	0.000714797	0.00155496	0.00459179
2.47177	2.456	2.31514	2.08446	2.03156	0.00524617	0.0138157	0.00926518	0.0121538	0.00288875	0.00430889	0.00277078	0.00768244	0.00733789	0.000859896	0.00202437	0.0094142	0.00427906	0.00347647	0.000633444	0.00212344
2.4892	2.34189	2.40798	2.2312	2.14666	0.011429	0.0122982	0.00158292	0.0160369	0.096145	0.00113928	0.00168536	0.0111346	0.00349729	0.00650846	0.00496956	0.00385221	0.00647791	0.00137008	0.00442886	0.00094088
2.60174	2.41891	2.34762	2.16045	1.97515	0.00248244	0.0180666	0.00260705	0.0061614	0.00524845	0.00411214	0.0175829	0.00378728	0.00969342	0.000617739	0.00223523	0.000371051	0.00038807	0.00287428	0.00337136	0.00953932
2.4193	2.35104	2.22232	2.04776	1.92223	0.0171534	0.00183686	0.00295287	0.00476987	0.00499479	0.0036723	0.00403496	0.00239963	0.00794062	0.00228957	0.000697534	0.00179438	0.0133132	0.00812135	0.00154528	0.00657066
2.58564	2.47589	2.30995	2.16925	1.92724	0.0240745	0.0036908	0.0012804	0.00749356	0.000234247	0.00315089	0.00458852	0.00966341	0.0242156	0.00245996	0.0072008	0.0153118	0.0026265	0.00324127	0.00266239	0.00269271
2.57771	2.42974	2.24726	2.21723	2.05906	0.0139245	0.00298237	0.00680364	0.0041438	0.0238142	0.0131729	0.0055913	0.0500214	0.0107207	0.00270215	0.00118433	0.010086	0.00108186	0.0194048	0.00328462	0.00105437
4.06184	3.97862	3.91108	3.96821	3.87665	0.00573603	0.00478865	0.00446311	0.0698158	0.164841	0.0948066	0.00173576	0.169502	0.0315677	0.0204266	0.150407	0.00864355	0.262351	0.231997	0.00855918	0.00705065
3.89919	3.7577	3.74942	3.65386	3.66353	0.00188932	0.18256	0.0107333	0.00474901	0.0866603	0.0365925	0.0116623	0.0682425	0.088544	0.0986989	0.00221903	0.0641892	0.0668253	0.0266722	0.00728242	0.00545332
3.34979	3.21886	3.26753	3.16822	3.08166	0.0829629	0.0900866	0.220521	0.273296	0.0117422	0.021358	0.411354	0.152915	0.036102	0.17574	0.0803378	0.00379547	0.0532567	0.0066123	0.0724804	0.008863
3.3941	3.43364	3.35705	3.34703	3.27848	0.0141604	0.014982	0.24869	0.0169559	0.0359508	0.0360946	0.0963703	0.117702	0.0394014	0.173949	0.0126458	0.00472678	0.0154749	0.200927	0.00146207	0.00205741
3.66954	3.61005	3.55854	3.40087	3.52001	0.0953901	0.504744	0.122306	0.0598443	0.00100206	0.020316	0.0038793	0.125545	0.00126481	0.109828	0.0604008	0.00867916	0.00110302	0.0104831	0.0385147	0.132253
3.50523	3.65168	3.33946	3.30889	3.3325	0.278916	0.00311415	0.0216151	0.0046731	0.120573	0.0337558	0.00773579	0.0711709	0.184949	0.000498627	0.301329	0.0341704	0.0025388	0.046666	0.00461863	0.0970682
3.28539	3.14804	3.20192	3.09687	3.05321	0.00955105	0.00272967	0.0203594	0.0335956	0.0167216	0.00375928	0.0299685	0.2518	0.123376	0.00195097	0.00892418	0.00684857	0.0323372	0.00862379	0.112306	0.39819
3.19891	3.14399	3.0496	2.97372	2.98742	0.037533	0.370027	0.00303628	0.0483936	0.00136217	0.0233505	0.00155747	0.00122285	0.00426447	0.00515316	0.356209	0.316145	0.0147698	0.00545715	0.0360863	0.12375
3.2082	3.09159	3.18901	3.12117	3.01038	0.0639124	0.00606785	0.0200943	0.0644379	0.0428801	0.16117	0.0653783	0.0677344	0.00281243	0.0100037	0.00143144	0.025497	0.106982	0.0129553	0.00594324	0.0168917
2.8553	2.80581	2.80925	2.64612	2.6184	0.00498723	0.00945941	0.00252544	0.0237172	0.041653	0.0486106	0.0206043	0.0587549	0.00261774	0.147618	0.0593468	0.314965	0.105856	0.0768863	0.0158845	0.0341786
2.15408	2.21643	2.17596	2.27839	2.11319	0.233916	0.0825053	0.0303765	0.0617712	0.0494302	0.0433127	0.0114899	0.0795306	0.00332698	0.0188645	0.0192263	0.00590412	0.0311317	0.0742218	0.0127952	0.0509507
3.09604	2.99692	3.09069	2.96505	2.7604	0.0955677	0.00222937	0.100562	0.00812142	0.00637499	0.121608	0.0194118	0.119021	0.132212	0.00870854	0.0621787	0.115301	0.00783864	0.0466131	0.156303	0.000851368
2.26337	2.23776	2.25011	2.203	2.06753	0.00631997	0.00307251	0.00498649	0.0255499	0.00299222	0.160905	0.00399103	0.0415907	0.220067	0.0315183	0.116596	0.356282	0.369084	0.001337	0.0011155	0.0282332
2.31095	2.09107	1.86803	1.90451	1.82845	0.00495126	0.0491761	0.00836354	0.0797376	0.0093832	0.0354473	0.179588	0.0236676	0.00179277	0.0226725	0.139082	0.0417296	0.0319323	0.113281	0.0730108	0.0064826
2.70868	2.6014	2.57389	2.60335	2.36147	0.0112392	0.0020956	0.00692036	0.085998	0.00492201	0.122713	0.0229893	0.0459965	0.0311435	0.0363411	0.04447	0.146879	0.00472002	0.0797794	0.000968891	0.0352213
2.16371	2.21134	2.16715	2.11404	2.06936	0.0170057	0.00619633	0.0146598	0.011738	0.00493102	0.0111678	0.0131339	0.00869749	0.0322437	0.0285271	0.0262939	0.104084	0.111478	0.0188118	0.0789033	0.021821
2.12603	2.22905	2.13234	2.088	2.02268	0.0747773	0.0670056	0.118195	0.065335	0.00918388	0.00442695	0.107869	0.00343187	0.00312057	0.0375315	0.0305383	0.0343452	0.00294451	0.00221919	0.00213174	0.0162255

## Sheet: figure2(d)
3.57322	3.51033	3.42205	3.27336	3.25475	3.06684	2.87511	2.69314	2.66642	2.58318	2.43123	2.3766	2.06966	0.101463	0.126183	0.068326	0.0687265	0.0489539	0.0933327	0.0508748	0.0471651
3.48563	3.46851	3.32653	3.40496	3.14676	2.98049	2.84999	2.72172	2.40989	2.59216	2.41309	2.10984	2.07707	0.226746	0.0468963	0.155999	0.0759457	0.0622904	0.130128	0.0577161	0.0974345
3.51852	3.64945	3.31538	3.0854	3.07686	3.01924	2.8961	2.80909	2.64003	2.52585	2.18923	2.21526	2.16328	0.263023	0.106608	0.18709	0.128261	0.0400929	0.0582986	0.0525879	0.0455255
3.34172	3.34607	3.26913	3.09557	3.04297	2.93726	2.81138	2.7374	2.53844	2.27408	2.34133	2.18002	1.91608	0.388394	0.0572652	0.0332197	0.107671	0.104576	0.0564932	0.0540407	0.0706613
3.40267	3.2414	3.18318	3.0066	2.89556	2.87531	2.57702	2.64271	2.60742	2.3666	2.21818	2.08229	1.72069	0.414786	0.125182	0.0784635	0.0407315	0.0504636	0.0248122	0.0399784	0.0712958
3.28045	3.15025	3.10123	3.00826	2.85289	2.63056	2.47397	2.51867	2.43528	2.20723	2.04318	1.91589	1.37007	0.0582361	0.0877315	0.1347	0.0593312	0.0622552	0.0877224	0.0508052	0.0422941
3.34905	3.25684	3.08652	2.88624	2.89924	2.76281	2.7195	2.49194	2.31022	2.26468	2.03259	1.81671	1.6054	0.131509	0.046841	0.064997	0.0526896	0.0631186	0.031881	0.0623245	0.055208
3.08184	3.16665	3.01731	2.87371	2.78506	2.67211	2.57246	2.41524	2.25725	2.03019	1.99092	1.82309	1.64175	0.194478	0.0489469	0.0535649	0.068619	0.0398349	0.094882	0.014028	0.0391632
3.15765	2.98635	3.0165	2.89461	2.70923	2.58469	2.42744	2.36576	2.31026	2.07616	1.9863	1.70476	1.32159	0.0610943	0.101843	0.0807592	0.0533251	0.0419754	0.0864473	0.0286882	0.0212202
3.14642	2.97537	2.95533	2.80911	2.53332	2.37893	2.45039	1.99621	2.20151	1.94221	1.66469	1.87339	1.44039	0.129959	0.106383	0.0517098	0.10486	0.0517594	0.0235996	0.021655	0.0788114
2.99815	3.05464	2.95387	2.83066	2.63214	2.56405	2.26944	2.12112	2.10294	1.99542	1.72332	1.73914	1.25999	0.0452235	0.0851491	0.0559989	0.0383451	0.0896382	0.076113	0.0454007	0.0657029
2.99132	3.02327	2.91176	2.71309	2.56829	2.56954	2.27731	2.1264	2.03805	1.86422	1.66158	1.51688	1.61182	0.0876092	0.0554278	0.147779	0.0766433	0.033602	0.114472	0.0417133	0.048417
3.15292	2.94118	2.94478	2.58514	2.59757	2.62051	2.35959	2.34378	2.03988	1.8867	1.6962	1.75682	1.28357	0.115303	0.0314383	0.0490572	0.0346244	0.0711167	0.067811	0.0673199	0.0478105
2.9493	2.77785	2.87973	2.57703	2.32117	2.21224	2.14018	1.73309	1.84798	1.3163	1.28861	1.47812	1.30783	0.0267077	0.0350553	0.0614773	0.0543208	0.0252777	0.0343522	0.0571757	0.04723
3.18992	2.95891	2.89569	2.81376	2.71623	2.64815	2.42005	2.25352	2.13407	1.87773	1.98786	1.93395	1.46058	0.0542127	0.104114	0.0305934	0.0588613	0.0542252	0.0905332	0.0485673	0.0646722
3.07118	2.95795	2.9358	2.70901	2.59324	2.53671	2.36236	2.23014	2.16898	1.73578	1.65159	1.65883	1.54522	0.0674055	0.0489437	0.077652	0.0707764	0.0433792	0.0611081	0.0176637	0.0614533
3.02895	2.88543	2.86418	2.73002	2.60475	2.59264	2.42629	2.18621	2.0384	1.98586	1.72148	1.63193	0.923976	0.0856971	0.0564651	0.0725089	0.0526928	0.0718329	0.0503447	0.0446834	0.0303703
2.98763	2.76097	2.69073	2.81918	2.61946	2.35687	2.40727	2.25795	1.98086	2.1474	1.77695	1.51467	1.40734	0.170262	0.0816907	0.0817079	0.151279	0.0554253	0.0489572	0.0373237	0.0427704
3.04477	2.82891	2.61096	2.40336	2.30359	2.32031	2.21246	2.11544	1.99269	1.84564	1.67473	1.68017	0.851208	0.0796621	0.0464104	0.0760422	0.0621274	0.100787	0.00887931	0.0325131	0.0432669
2.78317	2.65231	2.44132	2.38841	2.29843	2.10164	1.92976	1.76494	1.81434	1.51693	1.39478	0.640417	0.834218	0.0841561	0.0668298	0.0973531	0.075649	0.0498608	0.0869833	0.0815551	0.0504249
3.05347	2.72779	2.64867	2.58136	2.37059	2.24334	2.13071	1.95403	1.98672	1.97191	1.62612	1.46691	1.08592	0.0848744	0.0637504	0.0612626	0.0873013	0.0826838	0.129055	0.0807482	0.0354977
3.09039	2.69614	2.65008	2.55637	2.39788	2.42822	2.24989	2.04188	1.92049	1.7859	1.66999	1.64088	1.24432	0.0551481	0.112322	0.0455801	0.101963	0.0517946	0.154507	0.0466121	0.0722513
3.05065	2.6662	2.68762	2.45448	2.35615	2.34785	2.11622	2.02671	1.87204	1.79195	1.38505	1.54643	1.3469	0.0469626	0.0550371	0.109599	0.108726	0.0704252	0.058081	0.0102491	0.0525812
2.82103	2.83108	2.42288	2.42325	2.2191	2.33118	2.16009	2.13912	1.79361	1.87053	1.52085	1.23155	1.06824	0.0480008	0.124807	0.0517773	0.0688984	0.043189	0.0431374	0.0549897	0.0739788
2.91195	2.67921	2.78836	2.57599	2.43851	2.44406	2.11252	2.14346	1.76603	1.85737	1.7133	1.63103	0.873175	0.0506399	0.0474125	0.0371114	0.0390996	0.0437216	0.0810376	0.0543861	0.0821444
2.98091	2.67768	2.62068	2.55147	2.53361	2.21611	2.21263	2.07005	1.94285	1.64843	1.31911	1.43717	1.03733	0.114748	0.047399	0.13696	0.155886	0.0652639	0.0681724	0.0842265	0.019059
2.84864	2.64997	2.57336	2.43363	2.46889	2.3405	2.19057	1.91244	2.12965	1.53269	1.63499	1.27747	1.43089	0.0987261	0.118695	0.0649815	0.0467999	0.0627303	0.0303815	0.0627219	0.0402761
2.97468	2.70635	2.73026	2.64644	2.33576	2.42467	2.16332	2.08679	2.06567	1.88213	1.49113	1.58473	1.36531	0.0913942	0.097481	0.0803295	0.035588	0.0281495	0.0571172	0.0904841	0.04106
2.83235	2.56267	2.66832	2.47794	2.29409	2.00573	2.13598	1.84498	1.65131	1.67912	1.42882	1.49295	1.01342	0.130628	0.0800556	0.152377	0.0617045	0.0805891	0.136862	0.0309501	0.0754416
3.00724	2.63271	2.87214	2.56812	2.38866	2.3338	2.13722	2.00511	1.75893	1.87727	1.78362	1.3476	0.813168	0.221586	0.0641456	0.176934	0.0467696	0.0537744	0.0696192	0.0472676	0.0560181
2.78648	2.74636	2.4815	2.57011	2.37413	2.25127	2.04389	1.96365	1.82468	1.49346	1.5184	1.44275	1.09263	0.0954562	0.111364	0.0374248	0.0394312	0.0617884	0.0665852	0.0505513	0.0594336
3.04675	2.80171	2.71453	2.63051	2.40008	2.37583	2.21576	2.11681	1.81321	1.79111	1.53721	1.58275	1.14714	0.135665	0.110435	0.124029	0.076685	0.044036	0.0366995	0.0538397	0.0834375
2.35971	2.24875	2.40328	2.16387	2.09141	1.85618	1.90737	1.8013	1.57942	1.33151	1.25914	0.683854	0.781443	0.059651	0.034028	0.0749809	0.0495045	0.0619197	0.0352419	0.0307124	0.0652085
2.42081	2.35467	2.35747	2.25764	2.18797	1.88838	1.78567	1.60925	1.53348	1.26988	1.37301	0.917296	0.824767	0.0760733	0.0480291	0.0686475	0.0689458	0.0365751	0.0409614	0.0556979	0.0818269
2.64395	2.32993	2.21522	2.09103	2.06996	1.89726	1.91825	1.70707	1.51154	1.48537	1.37531	0.934433	0.363551	0.0218685	0.114734	0.0177142	0.0571751	0.0570459	0.0722177	0.0736133	0.0684011
2.37494	2.1938	1.995	2.11056	2.09099	1.74413	1.83065	1.28797	1.33306	1.04494	1.2956	0.616797	0.29191	0.0765751	0.0727854	0.0538386	0.0393804	0.0425069	0.0859589	0.0557058	0.0501723
2.54023	2.34489	2.35561	2.17099	2.13332	1.89081	1.72969	1.30084	1.54021	1.03934	0.544291	0.593866	0.934508	0.0521294	0.130732	0.0367044	0.0839305	0.0731685	0.0901411	0.0320637	0.049286
2.51281	2.42491	2.24043	1.92748	2.08732	1.94968	1.55338	1.81362	1.52082	1.15369	1.36282	1.21397	0.498281	0.198011	0.07524	0.106715	0.0989397	0.0613753	0.0367186	0.0493714	0.0505258
2.28792	2.201	2.39227	2.01887	2.09529	1.62245	1.84851	1.64525	1.15611	1.38947	1.01879	1.12911	0.881013	0.0769486	0.0544402	0.0624518	0.0619729	0.062208	0.0574982	0.0412169	0.0822351
2.3196	2.11167	2.02905	1.73851	1.46162	1.44707	1.63031	1.26168	1.04682	0.714561	0.543219	0.85338	0.287531	0.0886063	0.039415	0.133106	0.0779455	0.0263987	0.097489	0.0415749	0.0516556
2.55757	2.3456	2.26675	2.11708	1.94295	1.89863	1.66264	1.62715	1.52567	1.38459	1.21325	1.12434	0.586493	0.0361842	0.045148	0.0853807	0.0556045	0.0477893	0.047037	0.0694709	0.0685833
2.57982	2.41648	2.33182	2.19321	1.73189	2.02317	1.58057	1.86389	1.49076	1.31102	1.09517	0.859068	0.704227	0.0448582	0.0686504	0.107056	0.0563169	0.039519	0.0650663	0.0904091	0.0451325
2.42332	2.19703	2.23095	2.24304	1.91933	1.83457	1.70311	1.38212	1.06174	1.25184	0.899959	0.960549	0.65702	0.0705979	0.0161516	0.0875499	0.0477174	0.0311328	0.0249486	0.0563436	0.0451449
2.63926	2.23339	2.27434	2.23572	2.20088	1.93826	1.73801	1.42044	1.52533	0.805945	0.269071	0.546568	0.747285	0.0770195	0.0319068	0.134878	0.0426146	0.0401053	0.0396755	0.0264671	0.0336062
2.45167	2.29243	1.82052	2.201	1.96212	1.85558	1.66503	1.56319	1.44639	1.36996	0.545815	0.600465	0.257565	0.0882001	0.0737478	0.172359	0.0342546	0.0657768	0.0882316	0.0513892	0.0372444
2.48638	2.35343	2.2781	2.24315	2.13246	1.96022	0.778907	1.64752	1.50571	1.38344	1.09155	1.3951	0.160779	0.121006	0.0356749	0.036742	0.125388	0.0402699	0.0725341	0.0454915	0.0892536
2.53262	2.21784	2.23662	2.20492	1.99203	1.84545	1.7171	1.84386	1.70075	1.47222	1.07189	1.23019	0.777497	0.148319	0.0986942	0.10599	0.123547	0.0490733	0.0851952	0.0195401	0.0258751
2.6011	2.38255	2.32772	2.07301	2.10787	2.08135	1.80949	1.69951	1.40655	1.64516	0.976668	1.11485	1.14769	0.0736518	0.0999405	0.0991325	0.0881059	0.0564709	0.026998	0.0311322	0.0475645
2.30758	2.31855	2.20143	2.04946	1.94447	1.82381	1.84308	1.69125	1.43943	0.891629	1.38603	1.07948	0.471668	0.0381624	0.101001	0.125006	0.032184	0.0749698	0.0993543	0.0224969	0.0567933
2.14397	2.11069	1.75094	1.73108	1.65263	1.57233	0.722371	1.15495	0.507679	1.11047	0.506852	0.852559	0.450067	0.0644985	0.0345375	0.081899	0.0606663	0.0396924	0.0834228	0.0464426	0.0519405
2.17755	2.11052	2.16347	2.03871	1.66957	1.66499	1.64527	1.21011	1.30567	1.18137	0.993448	0.786978	0.632834	0.110381	0.110704	0.104571	0.0629611	0.0398002	0.0445043	0.0852506	0.0319465
2.27533	2.31385	2.17655	1.87865	2.15561	1.7593	1.49399	1.64344	1.45032	1.01239	0.940906	0.985911	0.208005	0.0947787	0.0347111	0.0546576	0.0983233	0.0551369	0.0296841	0.048523	0.0174506
2.28529	1.98518	2.08332	1.80125	1.58512	1.68617	1.59286	1.38223	1.3307	0.548248	0.785258	0.37519	0.257848	0.0414832	0.0485413	0.119715	0.0271149	0.0688252	0.0863608	0.0422718	0.04798
2.45392	2.48743	2.13236	2.18241	2.13927	1.83432	1.60781	1.72145	1.50655	1.23257	1.39419	0.573885	0.527176	0.0760704	0.078977	0.0611575	0.0441196	0.0461866	0.0543125	0.0674743	0.0468475
1.71042	1.56696	1.71559	1.40045	0.922243	0.571319	0.485959	0.108222	0.326826	0.115259	0.185955	0.0780383	0.142704	0.0862077	0.0455073	0.0752022	0.0420687	0.0546663	0.0417589	0.0622153	0.0496648
2.4301	2.3113	2.3821	2.16262	1.90585	1.55644	1.8857	1.662	1.38693	1.36529	0.900231	0.842934	0.526248	0.0718244	0.046309	0.0326033	0.0651467	0.0520424	0.0461178	0.0481003	0.0585289
2.55243	2.42701	2.33949	2.12922	2.11859	1.72425	1.68585	1.65644	1.62479	1.3932	1.03077	0.972156	0.563204	0.0644696	0.0567977	0.0789161	0.0929025	0.0842177	0.0700323	0.0732187	0.0265055
2.50478	2.26597	2.23548	2.13832	1.99861	1.97064	1.85793	1.8124	1.72209	0.74029	1.10249	0.488116	0.966426	0.0651298	0.0413192	0.0517741	0.0902487	0.0643957	0.0498675	0.0547717	0.0689096
2.50343	2.3404	2.11761	1.95296	1.99838	1.87153	1.74333	1.61296	1.31148	1.15719	0.839159	0.922117	0.131565	0.0511264	0.0731139	0.0616306	0.0717435	0.113518	0.0374265	0.0738608	0.0519518
2.4939	2.39931	2.43199	2.17324	2.24362	1.93572	1.32589	1.753	1.60237	1.38116	0.847098	1.16283	0.674884	0.0633591	0.108026	0.0488632	0.170529	0.0496462	0.0427069	0.03239	0.058263
2.52541	2.26725	2.28101	2.28412	2.17244	1.95391	0.935431	1.59566	1.40471	1.53964	0.936644	0.892494	0.445438	0.0540983	0.0772687	0.066053	0.0522566	0.111868	0.0268734	0.0620771	0.0586113
4.08492	3.89734	3.83209	3.99345	3.96643	3.77639	3.68602	3.76597	3.72277	3.63814	3.45141	3.34887	3.03879	0.600373	0.255582	0.601079	0.644789	0.366115	0.637431	0.250392	0.886508
3.79288	3.68329	3.71414	3.59728	3.61377	3.67629	3.56771	3.47094	3.39131	3.31774	3.17338	3.22865	2.81846	0.420184	0.198469	0.561006	0.26979	0.257833	0.0577459	0.212346	0.206315
3.337	3.22497	3.10716	3.03619	3.00026	3.08229	3.0201	2.99394	2.90409	2.7174	2.61878	2.72729	2.38401	0.238693	0.209354	0.388058	0.303753	0.270008	0.272908	0.30338	0.473512
3.40231	3.42604	3.34771	3.42223	3.40788	3.27209	3.22787	3.05845	3.15395	3.00836	3.0277	2.82963	2.75878	0.728801	0.345372	0.0811763	0.306229	0.303439	0.220558	0.159493	0.0849292
3.65862	3.55777	3.54146	3.48186	3.44741	3.37657	3.36004	3.4083	3.21048	3.1776	3.03075	3.02472	2.83459	0.126727	0.226612	0.301896	0.424492	0.149619	0.334945	0.121181	0.215528
3.4572	3.43774	3.42814	3.18751	3.25767	3.33824	3.40269	3.18138	3.03472	2.88131	2.79842	2.73017	2.40126	0.794451	0.484668	0.334975	0.205846	0.185336	0.171703	0.358456	0.0581347
3.14579	3.20875	2.97147	3.17306	3.05836	2.90907	2.76387	2.79142	2.75937	2.6973	2.67914	2.55458	2.14644	0.434305	0.43808	0.120616	0.0584826	0.5113	0.324657	0.392269	0.572099
3.19736	2.9982	2.94615	2.8948	2.93189	2.83892	2.80589	2.598	2.82684	2.57949	2.48522	2.49883	2.32164	0.301663	0.630637	0.247216	0.087565	0.117031	0.254721	0.167923	0.436325
3.13889	3.18737	3.09393	3.07049	3.09672	2.91407	2.94978	2.88108	2.75068	2.74086	2.56547	2.61099	2.35014	0.468024	0.116996	0.314951	0.0884416	0.16077	0.168969	0.369336	0.306667
2.98309	2.7956	2.70842	2.77189	2.63209	2.65846	2.62484	2.49404	2.57784	2.42083	2.16836	2.32313	2.07905	0.857445	0.165537	0.220653	0.315591	0.226009	0.330184	0.318944	0.272949
2.1867	2.17815	2.34912	1.94385	2.14575	2.10904	2.03066	1.80037	1.96231	1.93984	1.76461	1.77293	1.74366	0.246217	0.234639	0.093322	0.226538	0.215773	0.0494986	0.486793	0.338306
2.96516	2.87878	2.89019	2.89845	2.81014	2.83066	2.64548	2.78844	2.51101	2.62894	2.4887	2.16707	2.36424	0.421804	0.384812	0.0527393	0.0841376	0.16704	0.328189	0.0981838	0.303721
2.32553	2.21794	2.13575	2.23008	1.9836	1.98434	2.27571	1.99547	1.69846	1.80947	1.67941	1.42868	1.74954	0.515309	0.30278	0.262146	0.414162	0.254315	0.335804	0.311271	0.0545897
2.14098	2.04371	2.14372	2.04463	1.77347	1.55996	1.32995	0.762601	1.38663	0.621587	0.790893	0.911365	0.784548	0.419492	0.125408	0.243729	0.0917557	0.15054	0.0668054	0.480837	0.117271
2.61652	2.51909	2.34251	2.52404	2.60435	2.32698	2.42367	2.16268	2.17791	2.25283	1.95703	1.70864	1.59802	0.137802	0.164443	0.211918	0.456199	0.227198	0.384451	0.162085	0.195987
2.29991	2.25923	2.14219	1.88561	2.05262	1.97597	1.87998	1.92855	1.92622	1.62722	1.58374	1.73841	1.40942	0.375178	0.207739	0.263717	0.150911	0.170326	0.165159	0.270406	0.152784
2.30913	2.10969	2.07107	2.18772	2.08201	2.02042	2.02176	1.88022	1.85941	1.67756	1.67045	1.52454	1.27486	0.126303	0.222853	0.18791	0.136728	0.134541	0.266704	0.139536	0.149172

## Sheet: figure3(a)
-1.4	-1.36	-1.32	-1.28	-1.24	-1.2	-1.16	-1.12	-1.08	-1.04	-1	-0.96	-0.92	-0.88	-0.84	-0.8	-0.76	-0.72	-0.68	-0.64	-0.6	-0.56	-0.52
212.267	196.933	173.256	150.168	136.056	112.613	87.75	76.6748	75.824	51.716	39.768	38.568	30.308	23.96	22	20.856	17.116	13.688	14.188	12.308	12.056	9.808	8.816

## Sheet: figure3(b)
-1.1	-1.073	-1.046	-1.019	-0.992	-0.965	-0.938	-0.911	-0.884	-0.857	-0.83	-0.803	-0.776	-0.749	-0.722	-0.695	-0.668	-0.641	-0.614	-0.587	-0.56	-0.533	-0.506
233.2	224.833	209.6	199.488	134.784	118.636	103.781	74.656	60.516	36.088	30.796	21.404	20.232	14.42	11.464	9.176	7.54	6.876	4.984	4.372	4.052	3.28	3.136

[truncated: 40 more sheets: figure4(a), figure4(b), figure5(a), figure5(b), figure5(c), figure5(d), figure5(e), figure5(f), figure6(a), figure6(b), figure6(c), figure6(d), figure6(e), figure6(f), figure8(a), figure8(b), figureS1(a), figureS1(b), figureS1(c), figureS1(d) …]
